1 Sexual and Reproductive Health Needs of Women with Severe  
2 Mental Illness in Low- and Middle-Income Countries: A Scoping  
3 Review

4 Short Title: Sexual Health Needs of Women with Severe Mental Illness in Low- and  
5 Middle-Income Countries

6

7 Shilpa Sisodia<sup>1¶</sup>, Zara Hammond<sup>2¶</sup>, Jo Leonardi-Bee<sup>1,3</sup>, Charlotte Hanlon<sup>1,5</sup>, Laura Asher<sup>1,6</sup>

8

9 <sup>1</sup> Nottingham Centre for Public Health and Epidemiology, School of Medicine, University of  
10 Nottingham, Nottingham, United Kingdom

11 <sup>2</sup> Placed with NHS England Midlands Regional Public Health Directorate, Nottingham, United  
12 Kingdom

13 <sup>3</sup> Nottingham Centre for Evidence Based Healthcare, School of Medicine, University of Nottingham,  
14 Nottingham, United Kingdom

15 <sup>4</sup> College of Health Sciences, School of Medicine, Department of Psychiatry, Addis Ababa University,  
16 Addis Ababa, Ethiopia

17 <sup>5</sup> Centre for Global Mental Health, Health Service and Population Research Department, King's  
18 College London, Institute of Psychiatry, Psychology and Neuroscience, London, UK

19 <sup>6</sup> Institute of Mental Health, University of Nottingham

20

21 ¶ These authors contributed equally to this work.

22

23 \*Corresponding author:

24 [Laura.Asher@nottingham.ac.uk](mailto:Laura.Asher@nottingham.ac.uk) (L.Asher)

## 25 Abstract

### 26 Background

27 This scoping review aimed to understand the extent and type of evidence in relation to sexual and  
28 reproductive health needs of women with severe mental illness (SMI) in low- and middle-income  
29 countries (LMIC) and to summarise those needs.

### 30 Methods

31 Inclusion criteria were 1) focus on sexual and reproductive health needs 2) women or girls with SMI,  
32 professionals, caregivers of women with SMI and community members 3) study set in a LMIC 4) peer  
33 reviewed literature (no restriction on study date or design). Studies were identified from  
34 comprehensive searches of Medline, EMBASE, CINAHL and PsycINFO (to July 2023).

### 35 Results

36 The review included 100 papers. Most studies were cross-sectional and set in hospital outpatient  
37 departments. We identified studies in only 19 of 140 LMIC countries and only 15 studies were set-in  
38 low-income countries. Included studies often had multiple focus areas which were grouped into  
39 themes of HIV (prevalence, risk behaviour and knowledge), other sexually transmitted infections  
40 (STIs), sexual function, contraception use and family planning, sexual violence, fertility, pregnancy  
41 and postpartum.

42 Included studies indicated women with SMI have worse outcomes and worse sexual and  
43 reproductive health compared to both women without SMI and men with SMI. Women with SMI  
44 were shown to have higher rates of HIV and low levels of contraception knowledge and use, with  
45 little advice offered by professionals.

### 46 Conclusions

47 This review highlights the need for a greater diversity of study methodology, robustness of ethical  
48 and consensual reporting when researching vulnerable populations and for further research on

49 interventions and models of care aimed at addressing stigma, discrimination and improving the  
50 sexual and reproductive health of women with SMI. Future research should better represent the  
51 breadth of LMIC, investigate cultural adaptability of interventions and consider sexual health needs  
52 across the life course.

53

54

55

56

57

58

59

60

61

62

63

64

65

66

## 67 Introduction

68 Good sexual and reproductive health is fundamental to a person's 'physical, mental, emotional and  
69 social wellbeing' [1][2][3][4][5][84]. The United Nations Convention on the Rights of Persons with  
70 Disabilities (CRPD) sets out that access to high quality, non-discriminatory preventative and  
71 treatment services and the rights of individuals to make their own choices about their reproductive  
72 and sexual health are human rights, which should not be compromised by disability due to mental,  
73 physical, intellectual or sensory impairment [6].

74 Good sexual and reproductive health describes individuals achieving their full potential for  
75 pleasurable and safe sexual experiences across the life course through being empowered to  
76 maintain their own sexual and reproductive health [1][7]. People experiencing poor sexual and  
77 reproductive health will have a greater need for health care to support them in reaching their  
78 optimal sexual and reproductive health [8]. Need for sexual and reproductive health care relates to  
79 the provision of safe, effective, accessible services, encompassing a broad range of activities  
80 including but not limited to detection, treatment and management of sexual and reproductive  
81 health-related conditions, comprehensive information and education on not only health risks but  
82 also sexual function and satisfaction, support for fertility choices including contraceptive, antenatal,  
83 childbirth, postnatal and abortion services, as well as sexual health across the life course including  
84 during and after menopause [8][7][9]. All aspects of sexual health needs should be experienced free  
85 from coercion, discrimination and violence [1].

86 High levels of unintended pregnancies, use of unsafe abortion methods, untreated sexually  
87 transmitted infections (STIs) and poor access to sexual health services are just a handful of examples  
88 illustrating that the sexual and reproductive health and healthcare needs of women living in low-  
89 and middle-income countries are not well met [8][9][10][11]. The reasons behind this are complex  
90 [12][10]. Beliefs around sexuality, reproductive health and gender are often closely underpinned by  
91 social, cultural and political views [11][13][14]. For women with severe mental illness (SMI), the

92 compounding effect of stigma and exclusion, economic deprivation associated with mental health,  
93 gender inequality, paucity of comprehensive mental and sexual health services in LMIC and  
94 psychosocial disability provides a multiplicity of conditions which make them acutely vulnerable to  
95 poor sexual health [14][11]. Many women with SMI are formally or informally subjected to the  
96 assumption that they lack capacity to make decisions about their own sexual and reproductive  
97 health [11][15]. This renders women with SMI vulnerable to human right abuses such as the  
98 experience of forced or coercive reproductive interventions and being deprived of or unable to  
99 access information and services related to sexuality and reproductive health, putting them at  
100 significantly greater risk of sexual violence with often little opportunity for justice [15] [11].

101 This scoping review aimed to understand and quantify the extent and type of evidence available in  
102 relation to the sexual and reproductive health needs of women with SMI in LMIC. Secondary to the  
103 this, the scoping review also aimed to summarise the sexual and reproductive health needs of  
104 women with SMI in LMIC.

## 105 Materials and Methods

106 This scoping review was conducted using the Joanna Briggs Institute (JBI) guidance for scoping  
107 reviews [16] and reported according to the PRISMA extension for scoping reviews [17]. A pilot  
108 literature search was conducted, showing a range of literature available on the research topic and no  
109 similar review published or underway. A scoping review protocol was developed and published on  
110 Open Science Framework on 2 June 2023, DOI: 10.17605/OSF.IO/P5YA8.

111 Inclusion criteria:

- 112 - Concept: Studies focusing on sexual and reproductive health (including but not limited to  
113 family planning, contraception, pregnancy and the postpartum period, sexual violence, sex  
114 work, STI, fertility, female orgasms, denial of sexual life), and;

115 Described need (the concept of “need” referred to any aspects of need including needs that  
116 are met, unmet, quantification of need, nature of need, determinants of need and needs in  
117 relation to services). Studies focusing solely on child sexual exploitation, parenting,  
118 marriageability and marital relationships and gynaecological topics were excluded.

119 - Population: Studies involving women or girls (including transgender women) and non-binary  
120 people assigned female at birth with SMI (including schizophrenia spectrum disorders,  
121 bipolar disorder, psychosis and depression with psychotic features). In studies where  
122 aggregated data were presented, studies were included if over 50% of participants had SMI  
123 and if over 80% of participants were women. Studies involving families, community  
124 members and professionals that interact with the above population were also included.

125 - Context: Studies conducted in a LMIC as defined by the World Bank. In studies where  
126 aggregated data were presented, studies were included if over 50% of participants were  
127 from LMIC (this was a post-hoc criterion applied to one study).

128 - Study Design: Peer reviewed qualitative and quantitative literature were included with no  
129 restriction on study type.

130

131 Search terms were based around three elements: terms related to sexual and reproductive health,  
132 terms related to SMI and terms related to LMIC. There was no specific search term related to  
133 women to avoid excluding studies that recruited both men and women. A search for peer reviewed  
134 studies was conducted on 23<sup>rd</sup> December 2022 (re-run 7th July 2023) on EMBASE using the EBSCO  
135 platform and Medline CINAHL and PsycINFO using the Ovid platform. Due to the large amount of  
136 peer reviewed literature identified, grey literature was not searched. There was no restriction on  
137 study date or language.

## 138 Screening of Studies

139 Studies identified from the searches were collated in Mendeley, de-duplicated and transferred into  
140 Rayyan for screening. One reviewer screened all articles with a second reviewer screening 20% of  
141 articles. Full texts of the potentially eligible studies were screened by two independent reviewers.

## 142 Data Extraction

143 A data extraction form was developed in Microsoft Excel based on the standard JBI template. Two  
144 reviewers each extracted data from 50% of the included studies. A third reviewer independently  
145 extracted data from 10% of studies for quality assurance. Data were extracted on study publication  
146 date, country, setting, study type, aim/purpose, total sample size, sample size of participants  
147 relevant to the inclusion criteria, participant characteristics, methodology, focus of study, outcome  
148 assessed and findings. Quantitative data were summarised and study findings were grouped  
149 thematically.

## 150 Results

151 The search identified 3054 articles, which included 332 duplicates, thus resulting in 2722 articles for  
152 title and abstract screening. Full text screening was carried out for 279 articles. An article published  
153 after re-run of the database was identified and added, thus yielding 280 articles for full text  
154 screening, of which 187 studies were excluded, primarily due to not meeting the eligibility criteria  
155 (concept/described need/context/population) for inclusion or full text articles not being available.

156 A total of 88 studies were included from the database searches and a further 12 papers were  
157 identified from citation searching. Therefore, the scoping review included 100 studies (Figure 1).  
158 Included studies are summarised in Table 1.

159

160

161 Figure 1: PRISMA flow diagram

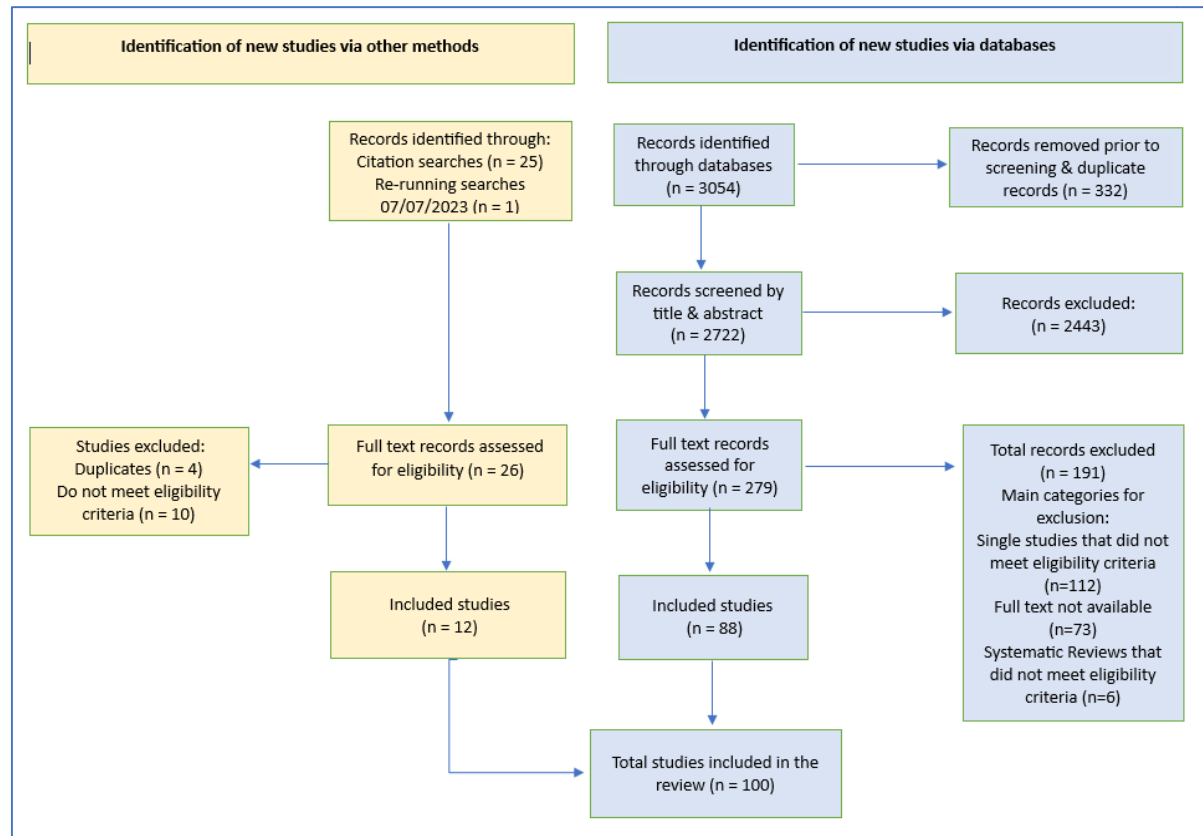

162

163

| Author            | Year | Country      | Setting                                         | Study type and methodology | Total sample size | Relevant sample size | Outcome measures                                     |
|-------------------|------|--------------|-------------------------------------------------|----------------------------|-------------------|----------------------|------------------------------------------------------|
| Abayomi[18]       | 2013 | Nigeria      | Psychiatric Hospital – inpatient and outpatient | Cross-sectional            | 102               | 28                   | Risky sexual behaviour (bespoke questions)           |
| Abekah-Carter[19] | 2022 | Ghana        | In the community                                | Qualitative                | 20                | 20                   | Sexual violence focus                                |
| Afe[20]           | 2016 | Nigeria      | Outpatient – Psychiatric Hospital               | Cross-sectional            | 77                | 77                   | Sexual assault (bespoke questions)                   |
| Aboobaker [21]    | 2022 | South Africa | Outpatient – Psychiatric Hospital               | Cross-sectional            | 368               | 181                  | HIV blood test                                       |
| Amr[22]           | 2012 | Egypt        | Outpatient – Psychiatric Hospital               | Cross-sectional            | 98                | 37                   | Trauma Assessment for Adults – Brief Revised Version |



|                   |      |                          |                                                 |                               |      |      |                                                                                                                         |
|-------------------|------|--------------------------|-------------------------------------------------|-------------------------------|------|------|-------------------------------------------------------------------------------------------------------------------------|
|                   |      |                          |                                                 |                               |      |      | (TAA)                                                                                                                   |
| Aneja[23]         | 2020 | India                    | Outpatient – Psychiatric Hospital               | Case Study                    | 1    | 1    | n/a                                                                                                                     |
| Bagadia[24]       | 2020 | India                    | Outpatient – Psychiatric Hospital               | Qualitative (grounded theory) | 42   | 42   | Pregnancy focus                                                                                                         |
| Ben[25]           | 2013 | Tunisia                  | Outpatient – Psychiatric Hospital               | Cross-sectional               | 61   | 61   | Sexual Behaviour Questionnaire                                                                                          |
| Bhatia[26]        | 2004 | India                    | Psychiatric hospital – inpatient and outpatient | Cross-sectional               | 368  | 108  | Fertility (bespoke questions)                                                                                           |
| Bram[27]          | 2014 | Tunisia                  | Inpatient – Psychiatric Hospital                | Cross-sectional               | 38   | 16   | Changes in Sexual Functioning Questionnaire                                                                             |
| Bursalioglu [28]  | 2013 | Turkey                   | Inpatient – Psychiatric Hospital                | Cross-sectional               | 196  | 96   | Personal Information Questionnaire (contraception use)                                                                  |
| Caqueo-Urizar[29] | 2018 | Bolivia<br>Peru<br>Chile | Outpatient – Psychiatric Hospital               | Cross-sectional               | 247  | 83   | Schizophrenia Quality of Life Questionnaire (SqoL18)                                                                    |
| Carey[30]         | 2007 | India                    | Inpatient – Psychiatric Hospital                | Cross-sectional               | 948  | 375  | Blood test; HIV-Risk Screening Instrument (HRSI)                                                                        |
| Carmo[31]         | 2013 | Brazil                   | Psychiatric hospital – inpatient and outpatient | Cross-sectional               | 2087 | 1089 | HCV seropositivity                                                                                                      |
| Carmo[32]         | 2014 | Brazil                   | Psychiatric hospital – inpatient and outpatient | Cross-sectional               | 2206 | 1147 | HbsAg seropositivity                                                                                                    |
| Ceylan[33]        | 2019 | Turkey                   | Outpatient – Psychiatric Hospital<br>Community  | Cross-sectional               | 186  | 186  | Attitudes, awareness and practices regarding reproductive health needs of people with schizophrenia (bespoke questions) |
| Chandra (a)[34]   | 2003 | India                    | Inpatient – Psychiatric Hospital                | Cross-sectional               | 146  | 146  | Sexual Experiences Survey;                                                                                              |

|                  |      |              |                                                                      |                 |      |      |                                                           |
|------------------|------|--------------|----------------------------------------------------------------------|-----------------|------|------|-----------------------------------------------------------|
|                  |      |              |                                                                      |                 |      |      | HIV-Risk Screening Instrument                             |
| Chandra (b) [35] | 2003 | India        | Inpatient – Psychiatric Hospital                                     | Cross-Sectional | 50   | 50   | Sexual Experiences Survey;                                |
| Chandra (c) [36] | 2003 | India        | Inpatient – Psychiatric Hospital                                     | Cross-sectional | 618  | 429  | HIV-Risk Screening Instrument (HIS)                       |
| Chandra[37]      | 2006 | India        | Inpatient – Psychiatric Hospital                                     | Cohort          | 39   | 19   | HIV knowledge (bespoke questions)                         |
| Chopra[3]        | 1998 | India        | Inpatient – Psychiatric Hospital                                     | Cross-sectional | 59   | 30   | HIV risk (bespoke questions); Blood test                  |
| Collins[38]      | 2006 | South Africa | Inpatient – Psychiatric Hospital                                     | Qualitative     | 46   | 46   | Sexual violence focus                                     |
| Collins[39]      | 2009 | South Africa | Inpatient – Psychiatric Hospital                                     | Cross-sectional | 151  | 75   | Blood test                                                |
| Collins[40]      | 2001 | South Africa | Mixed – inpatient and outpatient facilities (community and hospital) | Ethnography     | 56   | 56   | Sexual violence, sexual function, contraception use focus |
| Correa[41]       | 2020 | Colombia     | Outpatient – Psychiatric Hospital                                    | Cross-sectional | 160  | 79   | Contraception awareness (bespoke questions)               |
| De Oliveira [42] | 2012 | Brazil       | Mixed – inpatient and outpatient facilities (community and hospital) | Cross-sectional | 2475 | 1277 | Sexual violence (bespoke questions)                       |
| Desai[43]        | 2009 | India        | Outpatient – psychiatric hospital                                    | Case Study      | N/a  | N/a  | Ethical issues in pregnant women with SMI                 |
| Dogu[44]         | 2012 | Turkey       | Outpatient – Psychiatric Hospital                                    | Cross-sectional | 120  | 63   | Sexual function (bespoke questions)                       |
| Dutra[45]        | 2014 | Brazil       | Psychiatric Hospital – inpatient and outpatient                      | Cross-sectional | 2145 | 1129 | Self-reported STI                                         |

|                 |      |              |                                                 |                               |      |      |                                                                                         |
|-----------------|------|--------------|-------------------------------------------------|-------------------------------|------|------|-----------------------------------------------------------------------------------------|
| Eroglu[46]      | 2020 | Turkey       | Outpatient – psychiatric hospital               | Cross-sectional               | 117  | 58   | Contraception use, gravidity and parity (bespoke questions)                             |
| Esan[47]        | 2018 | Nigeria      | Outpatient – Psychiatric Hospital               | Cross-sectional               | 90   | 45   | Arizona Sexual Experiences Questionnaire; New Sexual Satisfaction Scale                 |
| Fanta[48]       | 2018 | Ethiopia     | Outpatient – Psychiatric Hospital               | Cross-sectional               | 422  | 132  | Change in Sexual Functioning Questionnaire                                              |
| Gebeyehu[49]    | 2021 | Ethiopia     | Outpatient – Psychiatric Hospital               | Cross-sectional               | 223  | 113  | Risky sexual behaviour (bespoke questions adapted from behavioural surveillance survey) |
| Ghebrehwet [50] | 2020 | Ethiopia     | In the community                                | Qualitative (grounded theory) | 39   | 39   | Sexual violence focus)                                                                  |
| Grover[51]      | 2019 | India        | Outpatient – Psychiatric Hospital               | Cross-sectional               | 219  | 65   | Contraception use and gravidity (bespoke questions)                                     |
| Guimarães [52]  | 2010 | Brazil       | Psychiatric hospital – inpatient and outpatient | Cross-sectional               | 2475 | 1277 | HIV risk behaviour (bespoke questions)                                                  |
| Guimarães[53]   | 2014 | Brazil       | Psychiatric hospital – inpatient and outpatient | Cross-sectional               | 2237 | 1161 | HIV seroprevalence                                                                      |
| Hall[54]        | 2019 | Timor-Leste  | In the community                                | Qualitative                   | 85   | 85   | Sexual violence focus                                                                   |
| Halouani[55]    | 2018 | Tunisia      | Outpatient – Psychiatric Hospital               | Case Control                  | 32   | 32   | Female Sexual Functioning Index (FSFI)                                                  |
| Hariri[56]      | 2009 | Turkey       | Outpatient – Psychiatric Hospital               | Cross-sectional               | 360  | 174  | Golombok Rust Inventory of Sexual Satisfaction                                          |
| Henning[57]     | 2012 | South Africa | Inpatient – Psychiatric Hospital                | Cross-sectional               | 195  | 95   | HIV rapid test; HIV ELISA test                                                          |
| Hocaoglu [58]   | 2014 | Turkey       | Outpatient – Psychiatric Hospital               | Cross-sectional               | 190  | 38   | Arizona Sexual Experiences Questionnaire                                                |

|                       |      |              |                                                 |                 |     |     |                                                                                                 |
|-----------------------|------|--------------|-------------------------------------------------|-----------------|-----|-----|-------------------------------------------------------------------------------------------------|
| Hou[59]               | 2016 | China        | Primary Care                                    | Cross-sectional | 607 | 279 | Arizona Sexual Experiences Questionnaire                                                        |
| Huang[60]             | 2019 | China        | Primary Care                                    | Cross-sectional | 720 | 272 | Arizona Sexual Experiences Questionnaire                                                        |
| Incedere[61]          | 2017 | Turkey       | Outpatient – Psychiatric Hospital               | Cross-sectional | 200 | 116 | Sexual violence (bespoke questions); Arizona Sexual Experiences Questionnaire                   |
| Joska[62]             | 2014 | South Africa | Outpatient – Psychiatric Hospital               | Cross-sectional | 100 | 85  | HIV appointment attendance (retrospective clinical record review)                               |
| Kazour[63]            | 2020 | Lebanon      | Inpatient – Psychiatric Hospital                | Cross-sectional | 60  | 30  | Sexual Behaviour Questionnaire                                                                  |
| Kesebir[64]           | 2014 | Turkey       | Outpatient – Psychiatric Hospital               | Cross-sectional | 57  | 28  | Arizona Sexual Experiences Questionnaire; Golombok Rust Inventory of Sexual Satisfaction (GRIS) |
| Kumar[65]             | 2021 | India        | Outpatient – Psychiatric Hospital               | Cross-sectional | 57  | 57  | Changes in Sexual Functioning Questionnaire                                                     |
| Loganathan [66]       | 2022 | India        | Outpatient – Psychiatric Hospital               | Qualitative     | 200 | 82  | Pregnancy focus                                                                                 |
| Lundberg [67]         | 2012 | Uganda       | Psychiatric hospital – inpatient and outpatient | Qualitative     | 20  | 13  | Sexual function and sexual violence focus                                                       |
| Lundberg [68]         | 2015 | Uganda       | Inpatient – Psychiatric Hospital                | Cross-sectional | 602 | 343 | World Health Organization Violence Against Women Instrument; HIV blood test                     |
| Lundberg [69]         | 2013 | Uganda       | Inpatient – Psychiatric Hospital                | Cross-sectional | 602 | 343 | Blood test                                                                                      |
| Madziro – Ruwizhu[70] | 2019 | Zimbabwe     | Outpatient – Psychiatric Hospital               | Cross-sectional | 270 | 142 | Blood test                                                                                      |
| Magalhães [71]        | 2009 | Brazil       | Outpatient – Psychiatric                        | Cross-sectional | 136 | 136 | Contraception use (bespoke                                                                      |

|                  |      |              |                                                 |                 |      |      |                                                                                        |
|------------------|------|--------------|-------------------------------------------------|-----------------|------|------|----------------------------------------------------------------------------------------|
|                  |      |              | Hospital                                        |                 |      |      | questions)                                                                             |
| Maling[72]       | 2011 | Uganda       | Inpatient – Psychiatric Hospital                | Cross-sectional | 272  | 116  | Blood test                                                                             |
| Mamabolo [73]    | 2012 | South Africa | Inpatient – Psychiatric Hospital                | Cross-sectional | 113  | 36   | Sexual violence (bespoke questions)                                                    |
| Marengo (a) [74] | 2015 | Argentina    | Outpatient – Psychiatric Hospital               | Cross-sectional | 126  | 63   | Contraception use (bespoke questions); London Measure of Unplanned Pregnancy (LMUP)    |
| Marengo (b) [75] | 2015 | Argentina    | Outpatient – Psychiatric Hospital               | Cross-sectional | 126  | 63   | Contraception use (bespoke questions); HIV-risk Time Line Follow Back interview (TLFB) |
| Mashaphu [76]    | 2007 | South Africa | Inpatient – Psychiatric Hospital                | Cross-sectional | 63   | 13   | HIV Blood test                                                                         |
| Matshoba[4]      | 2021 | South Africa | Outpatient – Psychiatric Hospital               | Cross-sectional | 214  | 76   | HIV knowledge and attitudes (bespoke questions)                                        |
| Melo[5]          | 2010 | Brazil       | Psychiatric hospital – inpatient and outpatient | Cross-sectional | 2475 | 1277 | HIV knowledge (bespoke questions)                                                      |
| Mere[77]         | 2018 | South Africa | Inpatient – Psychiatric Hospital                | Cross-sectional | 201  | 121  | HIV status (retrospective clinical record review))                                     |
| Mirsepassi [78]  | 2022 | Iran         | Outpatient – psychiatric hospital               | Qualitative     | 21   | 4    | Sexual function focus                                                                  |
| Mpango[79]       | 2022 | Uganda       | Outpatient – Psychiatric Hospital               | Cross-sectional | 1201 | 654  | Blood Tests (HIV and Syphilis)                                                         |
| Mwelase [80]     | 2023 | South Africa | Inpatient – psychiatric hospital                | Cross-sectional | 294  | 92   | HIV status (retrospective clinical record review)                                      |
| Nakhli[81]       | 2014 | Tunisia      | Outpatient – Psychiatric Hospital               | Cross-sectional | 100  | 30   | Arizona Sexual Experiences Scale                                                       |
| Nakigudde [82]   | 2013 | Uganda       | Outpatient – Psychiatric Hospital Community     | Qualitative     | 23   | 8    | Family planning and postpartum focus                                                   |
| Negash[83]       | 2019 | Uganda       | Outpatient –                                    | Cross-          | 442  | 115  | Risky sexual                                                                           |

|                  |      |          |                                                                                    |                                             |      |     |                                                                                                    |
|------------------|------|----------|------------------------------------------------------------------------------------|---------------------------------------------|------|-----|----------------------------------------------------------------------------------------------------|
|                  |      |          | Psychiatric Hospital                                                               | sectional                                   |      |     | behaviour (bespoke questions)                                                                      |
| Obo[84]          | 2019 | Ethiopia | Outpatient – Psychiatric Hospital                                                  | Cross-sectional                             | 424  | 201 | Risky sexual behaviour (bespoke questions)                                                         |
| Olisah[85]       | 2016 | Nigeria  | Outpatient – Psychiatric Hospital                                                  | Cross-sectional                             | 255  | 133 | International Index of Erectile Function (IIEF) Questionnaire: Female Sexual Function Index (FSFI) |
| Opondo[86]       | 2018 | Botswana | Inpatient – Psychiatric Hospital                                                   | Cross-sectional                             | 1482 | 482 | HIV status (retrospective clinical record review)                                                  |
| Ozcan[87]        | 2014 | Turkey   | Inpatient – Psychiatric Hospital                                                   | Cross-sectional                             | 292  | 292 | Contraception use and knowledge, sexual violence (bespoke questions)                               |
| Ozcan[88]        | 2018 | Turkey   | Inpatient – Psychiatric Hospital<br>Outpatient – Psychiatric Hospital<br>Community | Cross-sectional and comparative descriptive | 349  | 149 | Prenatal Attachment Inventory; Maternal Attachment Scale                                           |
| Pehlivanoglu[89] | 2007 | Turkey   | Outpatient – psychiatric hospital                                                  | Cross-sectional                             | 200  | 100 | Contraception use and knowledge (bespoke questions)                                                |
| Peixoto[2]       | 2014 | Brazil   | Psychiatric Hospital – Inpatient and outpatient                                    | Cross-sectional                             | 1475 | 791 | Contraception use, sexual violence, HIV knowledge (bespoke questions, clinical data)               |
| Pinto[90]        | 2007 | Brazil   | Inpatient – Psychiatric Hospital                                                   | Qualitative – Ethnography                   | 88   | 30  | HIV risk behaviour focus                                                                           |
| Poreddi[91]      | 2021 | India    | Inpatient – Psychiatric Hospital                                                   | Qualitative                                 | 20   | 20  | Sexual violence focus                                                                              |
| Rezaie[92]       | 2020 | Iran     | Inpatient – Psychiatric Hospital                                                   | Qualitative                                 | 42   | 42  | Pregnancy and sexual function focus                                                                |
| Sethuraman [93]  | 2019 | India    | Outpatient – psychiatric hospital                                                  | Cross-sectional                             | 96   | 96  | Modified National Family Health Survey-3                                                           |
| Shahvari [94]    | 2020 | Iran     | Inpatient –                                                                        | Qualitative                                 | 21   | 21  | HIV risk                                                                                           |

|                |      |              |                                                                       |                 |      |      |                                                                        |
|----------------|------|--------------|-----------------------------------------------------------------------|-----------------|------|------|------------------------------------------------------------------------|
|                |      |              | Psychiatric Hospital                                                  |                 |      |      | behaviour and contraception use focus                                  |
| Sibanyoni [95] | 2022 | South Africa | Psychiatric hospital – inpatient and outpatient                       | Qualitative     | 23   | 23   | Pregnancy and family planning focus                                    |
| Simiyon [96]   | 2016 | India        | Outpatient – Psychiatric Hospital                                     | Cross-sectional | 63   | 63   | Marital Quality Scale<br>Female Sexual Function Index (FSFI).          |
| Singh[97]      | 2009 | South Africa | Inpatient – Psychiatric Hospital                                      | Cross-sectional | 206  | 88   | HIV Blood tests – ELISA                                                |
| Souaiby [98]   | 2020 | Lebanon      | Outpatient – Psychiatric Hospital                                     | Cross-sectional | 95   | 13   | Psychotropic-Related Sexual Dysfunction Questionnaire (PRSexDQ)        |
| Souto[99]      | 2011 | Brazil       | Inpatient – Psychiatric hospital<br>Outpatient – Psychiatric Hospital | Cross-sectional | 2380 | 1232 | Self-reported HIV testing                                              |
| Terzian [100]  | 2006 | Brazil       | Outpatient – Psychiatric Hospital                                     | Cross-sectional | 167  | 65   | Fertility rate                                                         |
| Tharoor [101]  | 2015 | India        | Outpatient – Psychiatric Hospital                                     | Cross-sectional | 136  | 67   | Psychotropic Related Sexual Dysfunction Questionnaire (PRSexDQ-Salsex) |
| Tomruk [102]   | 2006 | Turkey       | Outpatient – Psychiatric Hospital                                     | Cross-sectional | 200  | 100  | HIV risk behaviour (bespoke questions)                                 |
| Tumwakire[103] | 2022 | Uganda       | Inpatient – Psychiatric Hospital                                      | Qualitative     | 14   | 14   | Sexual function, contraception use and sexual violence focus           |
| Tunde [104]    | 2013 | Nigeria      | Outpatient – Psychiatric Hospital                                     | Cross-sectional | 100  | 100  | Family planning experience/knowledge (bespoke questions)               |
| Wainberg [105] | 2007 | Brazil       | Psychiatric hospital – inpatient and outpatient                       | Qualitative     | 88   | 30   | Sexual function and contraception use focus                            |
| Wainberg [106] | 2008 | Brazil       | Outpatient – Psychiatric                                              | Cross-sectional | 98   | 50   | Sexual Risk Behaviour                                                  |

|                  |      |          | Hospital                                                              |                                |     |     | Assessment Schedule (SERBAS)                                   |
|------------------|------|----------|-----------------------------------------------------------------------|--------------------------------|-----|-----|----------------------------------------------------------------|
| Yang[107]        | 2023 | China    | Inpatient – Psychiatric Hospital<br>Outpatient – Psychiatric Hospital | Qualitative – phenomenological | 20  | 10  | Sexual function focus                                          |
| Yu[108]          | 2022 | China    | Psychiatric Hospital – inpatient and outpatient                       | Qualitative – phenomenological | 15  | 15  | Fertility, pregnancy, post-partum focus                        |
| Zerihun [109]    | 2020 | Ethiopia | Outpatient – General Hospital (psych dept)                            | Cross-sectional                | 422 | 422 | Gravidity, contraception use and knowledge (bespoke questions) |
| Zerihun(a) [110] | 2021 | Ethiopia | Outpatient - Psychiatric Hospital                                     | Nested qualitative             | 16  | 16  | Pregnancy, family planning, sexual violence focus              |
| Zerihun(b) [111] | 2021 | Ethiopia | Outpatient - General Hospital (psych dept)                            | Cross-sectional                | 422 | 422 | Adapted WHO Intimate Partner Violence tool                     |
| Zhang (a) [112]  | 2018 | China    | Inpatient - Psychiatric Hospital                                      | Cross-sectional                | 87  | 33  | Syphilis seroprevalence                                        |
| Zhang (b) [113]  | 2018 | China    | Inpatient - Psychiatric Hospital                                      | Cross-sectional                | 118 | 63  | Arizona Sexual Experience Scale                                |

## 164 Year of study

165 The oldest included study was from 1998 [3], whilst the most recently published were from 2023  
 166 [80][107]. Over the 25 years that relevant studies were published, 62 were published within the last  
 167 10 years. The highest number of studies were published in 2014 (n=10). Figure 2 displays the  
 168 number of included studies by publication year.



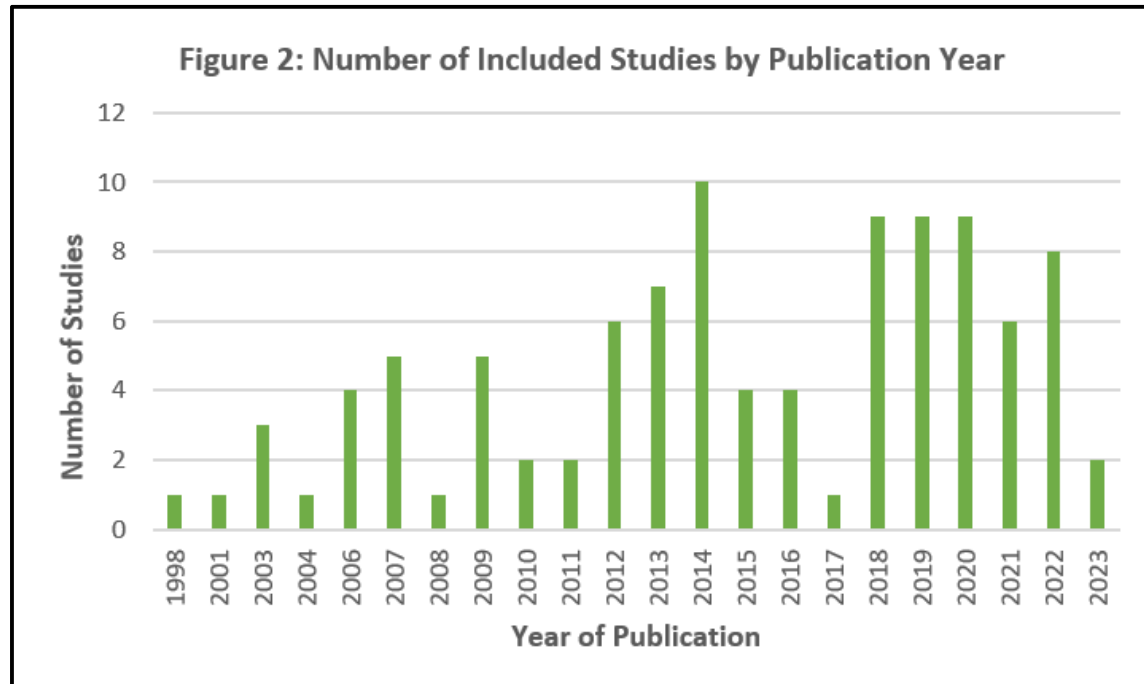

169

## 170 Context

171 Of the 140 LMIC globally, only 20 countries (14%) were represented in the included studies. Figure 3  
172 illustrates the breadth of countries in the review in proportion to the number of included studies  
173 from each of those countries. All studies focused on a single country, except for one study which  
174 included participants drawn from three South American countries. The most common continent for  
175 included studies was Africa (n=36). Asia was the second most common (n=24), followed by the  
176 Middle East (n=22) and South America (n=18).

177

178

179

180

181

182

183 **Figure 3: Countries displayed as a proportion of included studies.**

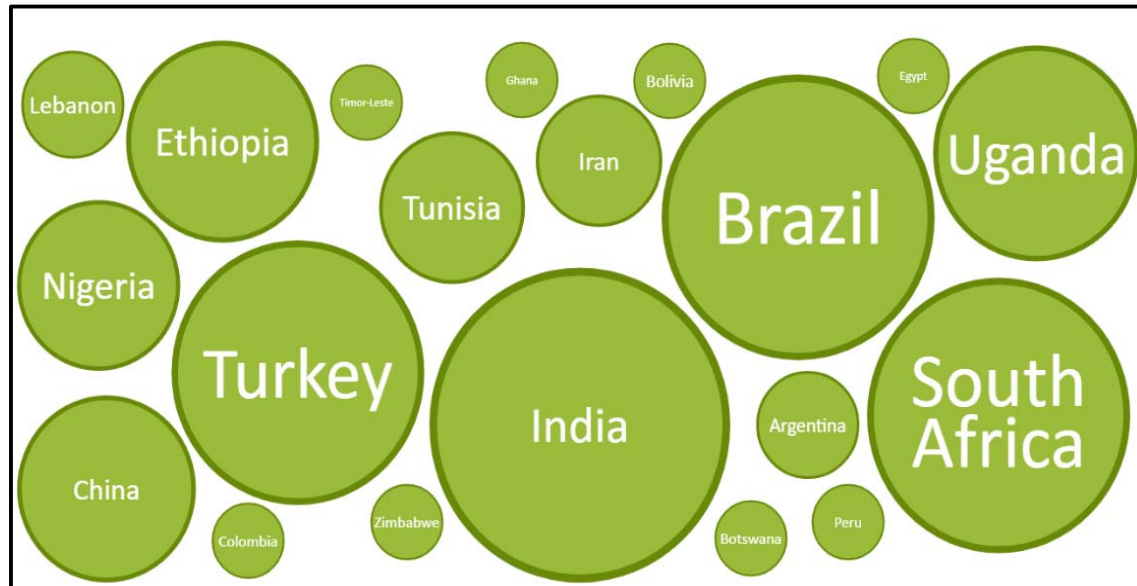

184  
185

186

187 India was the country setting for the largest number of studies (n=17). Other countries with >10  
188 included studies were Brazil (n=14), South Africa (n=13) and Turkey (n=12). This meant that 4 of the  
189 140 (3%) LMIC globally accounted for 56% of all included studies.

190 The topic of studies carried out in India were heterogenous. Eight of the 14 studies carried out in  
191 Brazil and 11 of the 13 studies carried out in South Africa focused on HIV. In contrast, most studies  
192 set in Turkey were focused on sexuality and sexual function (n=6) and family planning (n=4).

193 The majority (n=7) of studies in Uganda were based around HIV and HIV risk behaviours. Four of the  
194 six studies set in China were based around sexual function, three of which utilised the Arizona Sexual  
195 Experiences (ASEX) Questionnaire [59][60][113]. All Tunisian studies (n=4) were focused on sexuality  
196 and all Iranian studies (n=3) were qualitative.

197 Psychiatric hospital outpatient facilities were the most frequent setting for studies (n=46), followed  
198 by psychiatric hospital inpatient settings (n=29). In addition, a proportion of studies utilised mixed  
199 inpatient and outpatient psychiatric settings (n=20), five of which also incorporated participants

200 from the community. Two studies were conducted in primary care, both of which were based in  
201 China. A small number of studies were based solely in the community and not in health facilities  
202 (n=3).

## 203 Participants

204 A total of 38,510 participants were included in the studies, however some studies used the same  
205 participants so the total likely overestimates the number included. Of the total number of  
206 participants, 19,987 (52%) were relevant to the study population of this scoping review. Small  
207 numbers of men and women without SMI may be included in this total in studies that were not  
208 disaggregated by diagnosis or gender.

209 The most represented SMI diagnosis was schizophrenia. Twenty-eight studies focused solely on  
210 schizophrenia and people with schizophrenia were included in a further 54 studies. People with a  
211 diagnosis of bipolar disorder were included in 55 studies with an additional 8 studies exclusively  
212 focused on people with bipolar disorder.

213 Generally, inclusion criteria of the studies restricted participation to those 18 years of age or older.  
214 Only four studies [28][26][102][89] included women aged 15-years or above and one study included  
215 those aged 16 or older [18]. The oldest recorded participant included in a study was 83 years.  
216 Reporting of age ranges within studies was variable and some studies reported mean age of  
217 participants only. Where age range was reported, it was noted that only a handful of studies  
218 included women of menopausal age and older.

219 Participants without lived experience of SMI were included in 11 studies  
220 [19][105][103][94][82][78][54][50][40][38][33]. These included psychiatric nurses, midwives,  
221 administrators of mental health care facilities, caregivers or family members of people with SMI,  
222 government decision makers, mental healthcare providers, and people living in communities that  
223 include people with SMI.

## 224 Ethics

225 Included studies were searched for evidence of ethics approval, informed consent and assessment of  
226 capacity to consent. Nineteen of the 100 included studies did not report whether ethical approval  
227 had been obtained [23][25][36][35][34][37][43][44][51][55][65][66][71][81][102][90] [104][19].  
228 Seventy-six studies explicitly stated that informed consent had been sought from participants but of  
229 those, only 16 studies [31][32][37][36][42][52][57][60][67][70][5][2][99][110][111][113] included a  
230 statement that capacity to consent had been assessed prior to participants being included in studies.  
231 This means that almost a quarter of studies did not provide information in their published papers as  
232 to whether consent had been obtained and most studies in the review (n=79) did not include  
233 information as to whether capacity to consent had been assessed. A small number of papers (n=5)  
234 did not require assessment of capacity to consent due to the nature of the study or the focus of the  
235 study being participants without lived experience of SMI [19][112][40][38][33].

236 Of the studies that included participants aged 15 or 16 years and older (n=5), none explicitly stated  
237 that capacity to consent had been assessed [18][28][89][97][102] and one study did not document  
238 that consent had been obtained. All five studies did provide information indicating that ethics  
239 approval had been obtained.

## 240 Methodology

241 Most studies (n=76) implemented a cross-sectional design. Other quantitative study designs were  
242 one case control study [55] and one cohort study [37]. Questionnaires were the main data collection  
243 tool used in these studies. A sizeable number of studies also used blood samples as a data source.

244 There were 22 qualitative studies included in the review, two of which used ethnographic  
245 methodologies [40][90]. There were two case studies in the review [43][23]. Most of the qualitative  
246 studies used semi-structured interviews (n=18). The range of sample sizes for the qualitative studies  
247 was 14-200 participants.

## 248 Study Focus

249 Included studies frequently had multiple areas of focus. Focus areas were grouped into 6  
250 overarching themes. The largest domains were HIV prevalence, risk behaviour and knowledge  
251 (n=32), sexual function (n=30), contraception use and family planning (n=25), sexual violence (n=21),  
252 fertility, pregnancy and the post-partum period (n=19 studies) and non-HIV STIs (n=11). The most  
253 relevant results from each study have been reported in Appendix 2.

### 254 HIV (prevalence, risk-taking behaviour and knowledge)

255 All of the 14 studies that ascertained the prevalence of HIV reported it to be higher in women with  
256 SMI than in men with SMI [21][30][39][80][53][57][69][70][72][76][86][97][77]; however, not all of  
257 these studies were probabilistically sampled. Sixteen studies researched HIV risk behaviour  
258 [18][34][36][3][40][49][53][68][75][83][2][90][94][102][106]. Results were varied, although the  
259 majority reported HIV risk behaviour was generally higher among women with SMI than men with  
260 SMI. Key findings from three qualitative studies [40][90][94] found mental healthcare providers 1.)  
261 were more concerned about the avoidance of pregnancy than the avoidance of HIV, 2.) perceived  
262 patients to be at high risk of HIV, and 3.) noted that patients may not be able to 'resist' high risk  
263 sexual behaviour and may also lack the agency to refuse unprotected sexual intercourse.

264 Six studies assessed the knowledge of people with SMI about HIV/AIDS [37][3][4][5][102][2] with  
265 inconsistent findings between the studies. Three of the studies reported that HIV knowledge in  
266 women with SMI was lower than a comparator group of men with SMI [37][3] and a comparator  
267 group of women without SMI [102]. Women with SMI had a higher knowledge score in one study  
268 [5]. Two studies reported no significant difference in HIV knowledge score between men and women  
269 with SMI [2][4]. Limited evidence from individual studies reported that a higher proportion of  
270 women with SMI attended HIV appointments compared to men with SMI [62]. A study looking at  
271 whether men and women with SMI had ever had testing for HIV reported no significant difference  
272 [99].

## 273 STIs (not including HIV)

274 Most studies focused on non-HIV STIs used men with SMI as a comparator, with only one study  
275 comparing to women without SMI [75]. The prevalence of a range of STIs were reported. One study  
276 showed a similar prevalence of chlamydia between men and women[30]. In the three studies that  
277 reported the prevalence of syphilis, one showed no difference [79] whilst the other two showed  
278 prevalence to be higher in men [112][30]. A qualitative study noted the perception of mental  
279 healthcare providers that rates of syphilis were higher in their hospital population compared to the  
280 general population [40]. Two studies reported hepatitis B prevalence, both showed a higher  
281 prevalence of hepatitis B in men with SMI than women with SMI. Similarly, a study of hepatitis C  
282 prevalence showed a higher prevalence in men [30][32]. Prevalence of history of STI was reported by  
283 five studies [18][42][45][75][32]. Generally, studies showed a similar prevalence for history of STI  
284 between women and men but a study that compared women with SMI to women without SMI  
285 showed a higher prevalence of STI in women with SMI.

286 The two qualitative studies included utilised healthcare provider staff participants only or in  
287 combination with people with SMI [40][90]. One qualitative study suggested that mental healthcare  
288 providers felt that SMI patients were at a higher risk of STI than the general population [90].

289

## 290 Sexuality and Sexual Function

291 A total of 30 studies focused on sexuality and sexual function. The most commonly used measure of  
292 sexual function was the Arizona Sexual Experiences Scale (ASEX) which was used in eight of the  
293 included studies [81][58][61][64][59][60][47][113]. Other measures of sexual function included The  
294 Changes in Sexual Functioning Questionnaire (CSFQ) [48][27][65] and Female Sexual Functioning  
295 Index (FSFI) [55][96][85], the Sexual Behaviour Questionnaire (SBQ)[25], the Golombok Rust  
296 Inventory of Sexual Satisfaction (GRISS) [56][64], the Psychotropic-Related Sexual Dysfunction

297 Questionnaire (PRSexDQ)[101][98], the Sexual Risk Behaviour Assessment Schedule (SERBAS)[106],  
298 the Schizophrenia Quality of Life Questionnaire (SQoL18) questionnaire, specifically the “sentimental  
299 life score” component (measuring satisfaction with love life)[29]. One study used a bespoke scale  
300 and found more women with SMI than men with SMI reported a problem in their sexual life [44].

301 Of the 18 studies that used standardised measures of sexual dysfunction and compared women with  
302 SMI to men with SMI, ten studies reported higher levels of sexual dysfunction in women with SMI  
303 than men with SMI [85][81][60][59][106][47][107][61][98][25]. Five studies reported no significant  
304 difference between women with SMI and men with SMI [58][27][48][56][63]. Only one study  
305 reported higher levels of sexual dysfunction in men with SMI [101] and another reported lower  
306 levels of sexual satisfaction in men with SMI [29]. Limited evidence from one study indicated that  
307 self-reported levels of sexual dysfunction varied by gender when type of medication was taken into  
308 consideration [64].

309 Of those studies that did not use a male comparator, one study comparing groups of women with  
310 SMI taking risperidone or olanzapine medication for SMI found both groups to have high levels of  
311 sexual dysfunction [65], another study reported women with SMI to have higher levels of sexual  
312 dysfunction compared to women without SMI [55]. A third study reported 70% of women with SMI  
313 had high levels sexual dysfunction [96] although no comparator was used.

314 Eight qualitative studies relating to sexuality were identified [40][67][78][90][92][103][105][107].  
315 Stigmatisation was consistently reported by women with SMI and that this was at times perpetuated  
316 by healthcare providers. Examples given were perceptions that women with SMI lacked sexual needs  
317 and the promotion of lifelong abstinence. Studies including healthcare providers reported that staff  
318 caring for women with SMI agreed they have the same sexual desires as women without SMI. Both  
319 healthcare providers and people with SMI felt that sexuality could be affected by mental illness, with  
320 both increases and decreases in sexual activity described. Women with SMI described positive  
321 experiences of sexuality to be beneficial to their mental health but also negative sexual experiences

322 to be a result of their illness. There was limited research indicateing women with SMI were keen to  
323 learn more about the interaction between SMI and their sexual fulfilment. No studies reported  
324 sexuality or sexual function needs and experiences of lesbian, gay, bisexual, transgender, intersex,  
325 queer, asexual or other sexually or gender diverse LGBTQIA+ women with SMI.

## 326 Contraception and Family Planning

327 Twenty-five studies were based around contraception and family planning. The majority of these  
328 (n=13) focused on contraception use [28][40][43][51][53][71][74][75][2][90][94][105][106]. Four  
329 studies, which did not include a comparison, reported large proportions of women with SMI had  
330 never used contraception, had not used contraception during their most recent sexual experiences  
331 and had no intention of using contraception during sexual intercourse [87][109][71][93].

332 Of those studies that included a comparator, most studies used a comparator group of women with  
333 SMI rather than men with SMI. Contraception use compared to women without SMI was mixed with  
334 two studies stating no difference in contraceptive use [74][75], two studies stating women with SMI  
335 were more likely to use contraception [46][28] (in particular ‘traditional’ methods such as  
336 withdrawal and calendar methods) and one stating that women with SMI were less likely to use  
337 contraception [89]. There were similar results for studies comparing women with SMI to men with  
338 SMI; two studies found contraception use to be lower in women [51][2] whilst one study found it to  
339 be lower in men [41].

340 Four qualitative studies were also identified on the topic of contraception [94][103][105][106].  
341 Healthcare professionals perceived that women with SMI were commonly engaged in unprotected  
342 sex and therefore prescribed reversible contraceptive methods for them. Women with SMI felt they  
343 may be perceived negatively by partners for using condoms. When asked about knowledge of  
344 different types of contraception, coitus interruptus, condoms and intrauterine devices (IUDs) were  
345 generally the most cited.



346 A small number of studies looked at informed choices and knowledge when making contraception  
347 decisions. One study assessed whether there were differences in participants being informed about  
348 contraception based on gender and diagnosis of either schizophrenia or bipolar disorder [41]. A  
349 further study looked at the proportion of women with SMI referred to a perinatal psychiatric clinic  
350 and reported that health care providers had discussed contraception issues with them [43]. A  
351 qualitative study in Uganda looked at the autonomy of women with SMI in making contraception  
352 choices and noted that this was often absent, with consent taken from family members to force a  
353 woman to use contraception if she refused [103].

354 Seven studies focused on family planning advice from professionals [41][33][87][93][82][110][104].  
355 The focus of included studies was varied. Most studies looked at the quantity of provision or receipt  
356 of family planning advice from the perspective of either healthcare professionals or patients. None  
357 of the included studies assessed the quality of family planning advice provided. One study included a  
358 comparison and found more women with SMI received family planning advice compared to men  
359 with SMI [41]. In one study, 23.5% of healthcare professionals stated they gave family planning  
360 advice to patients [33], in another 21.9% of people with SMI stated they received family planning  
361 advice from professionals [87]. Two further studies concluded there was a lack of family planning  
362 advice being provided to patients from healthcare professionals [93][104]. In a qualitative study,  
363 caregivers and postpartum women with SMI felt that family planning education should be added to  
364 an existing psychoeducation programme [82]. Two studies reported that women with SMI felt that  
365 they would prefer to receive information about family planning from mental healthcare providers  
366 [110][104] as they are knowledgeable about the impact of their health conditions on family planning  
367 decision making.

368 Two studies (from India and Turkey) provided evidence of healthcare professionals making family  
369 planning decisions for patients [24][33], with forced abortion being considered necessary by over  
370 39% of health professionals working with people who have schizophrenia in one study [33]. Use of

371 sterilisation and abortion for failed contraception was reported in a qualitative study carried out in  
372 South Africa, which looked at the perceptions and experiences of mental health care staff [40].  
373 Another study found that family planning considerations affected desire to take medication and  
374 were influenced by medication, with some women with SMI not wanting to take sodium valproate  
375 due to teratogenicity risk [95].

## 376 Sexual Violence

377 Six studies [22][42][61][68][73][2] compared experiences of sexual violence in women with SMI to  
378 men with SMI or women without SMI. Most studies reported lifetime experience of sexual violence.  
379 Two studies reported experience of sexual violence from a partner or non-partner[68][87]. All but  
380 one study found women with SMI to be more likely to have experienced sexual violence. An Egyptian  
381 study reported men to be more likely to report sexual violence [22]. Six studies reported the  
382 prevalence of sexual violence in populations of women with SMI, and this ranged from 10%-100%  
383 [20][34][35][102][87][111].

384 There were nine qualitative studies [110][103][91][67][54][50][40][38][19] focusing on the theme of  
385 sexual violence. Two thirds of included studies utilised non-patient participants either wholly or in  
386 combination with people who have lived experience. Only three of the nine qualitative studies  
387 included exclusively people with lived experience of SMI [110][67][91].

388 All nine studies reported the vulnerability of women with SMI to sexual violence. This included  
389 women being raped by male patients, whilst inpatients in psychiatric facilities. In addition to reports  
390 of sexual violence, participants reported difficulties accessing medical care after rape for homeless  
391 women; rape resulting in unintended pregnancies and delayed discharge from medical care facilities  
392 in women who experienced sexual violence at home.

### 393 Fertility, Pregnancy and Postpartum

394 Five studies were based around fertility [26][51][74][100][108]. These were varied in terms of the  
395 outcome being studied. Three studies looked at conception and childlessness and found similar rates  
396 between women with SMI and men with SMI or women without SMI [26][51][74]. A study carried  
397 out in Brazil found lower fertility rates and fecundity in women with SMI compared to women in the  
398 general population [100]. A qualitative study described difficulties in the fertility process for women  
399 with SMI, alongside parenting being described as a rewarding process that aids recovery [108].

400 Fourteen studies focused on pregnancy [23][24][43][46][66][87][88][91][41][92][95][108] [109][110].  
401 Notably, the only two case studies included in this review were based around decision-making  
402 during pregnancy in the context of medication and abortion [23][43]. Seven studies mentioned the  
403 impact of medication on pregnancy and/or the effect of withholding medication during pregnancy.  
404 One qualitative study mentioned a higher risk perception related to impacts of medication on a  
405 fetus compared to risk of unmedicated mental illness during pregnancy [110]. One Turkish study  
406 included a comparator and found that women with SMI were less likely to have experienced  
407 antenatal care during pregnancy, had a greater frequency of Caesarean birth and were subject to  
408 more birth related trauma [88]. Two studies reported that high numbers of women with SMI  
409 experience unplanned pregnancy (51.4% of women in one study [87] and 87.8% of women who had  
410 experienced pregnancy in another [109]. A study that compared women with schizophrenia to  
411 bipolar disorder [41] found those with bipolar disorder to have a lower age of first pregnancy (22  
412 years for bipolar and 32 years for schizophrenia). Two studies reported pregnancy being discouraged  
413 for women with SMI, 69% of Ethiopian community members felt that women with SMI should not  
414 give birth in one study [110], whilst in India, there were reports of women being forced to abort or  
415 coerced not to have children [66]. A comment in another Indian study reported instances of  
416 pregnancy loss due to domestic violence [91]. One study found no significant difference in the  
417 number of pregnancies or number of lost or interrupted pregnancies between for women with

418 bipolar disorder compared to controls but that a higher proportion of women with bipolar disorder  
419 had a higher proportion of unplanned pregnancies [46].

420 Three studies were based in the postpartum period [88][82][108]. One study compared women with  
421 SMI to women without SMI and found that women with SMI were less likely to breastfeed, more  
422 likely to express concerns about infant care, experience childbirth related trauma and rely on others  
423 to care for their babies [88]. Two studies mentioned breastfeeding: a Ugandan study discussed  
424 instances of women with SMI being told not to breastfeed as mental illness could be passed onto an  
425 infant through breastmilk [82] and some women with schizophrenia in a Chinese study stated that  
426 breastfeeding could lead to a loss of routine for the women with SMI that could lead to an  
427 exacerbation of illness [108].

## 428 Discussion

429 This review identified a substantial body of evidence relating to the sexual and reproductive health  
430 needs of women with SMI in LMIC. The most studied domains of sexual and reproductive health  
431 were HIV and sexual function, followed by contraception and family planning, sexual violence,  
432 fertility, pregnancy and post-partum and finally non-HIV STIs. Age ranges were not reported for all  
433 studies but where age range was known, the literature indicated a focus on adult women of  
434 reproductive age. There were no studies specifically looking at sexual and reproductive health needs  
435 of women with SMI during menopause. This could however be influenced by some of the studies  
436 being conducted in countries where average life expectancy for women is close to expected age for  
437 menopause [114] and that menopause was not an included term in the search strategy. Sexual and  
438 reproductive health in girls and LGBTQIA+ women with SMI were also areas with no studies  
439 identified by this review.

440 The review frequently found themes of women with SMI in LMIC having worse sexual and  
441 reproductive health compared to both women without SMI and men with SMI. The increasing

442 number of studies over time may indicate this topic is receiving relatively more attention. However,  
443 only a small number of LMICs (14%) were represented in this review, signifying that the sexual and  
444 reproductive health needs of women with SMI remain underexplored in the majority of LMIC. Study  
445 focus varied by world region in this review with Middle Eastern studies mainly focused on sexuality  
446 and almost all South African studies focused on HIV. Schizophrenia was the most commonly  
447 represented SMI and the most common study type was cross-sectional (n = 76), followed by  
448 qualitative interview studies (n = 18).

449 A range of ethical concerns related to the sexual and reproductive health of women with SMI in  
450 LMIC were identified. In studies with mental healthcare providers, there were reports of women  
451 being forced to take medication and to undergo abortion and sterilisation. A 2019 Turkish study [33]  
452 reported that 79% of healthcare providers felt that forced abortion and sterilisation was necessary.  
453 A lack of agency was a theme throughout studies, with women reporting being pressured to not  
454 have children or breastfeed, for fear their illness would pass into their offspring. Women were also  
455 pressured by partners to avoid contraception. In addition, ethical approval, informed consent and  
456 capacity assessment procedures were not documented for a substantial minority of studies. These  
457 findings show that some women with SMI may not have their autonomy upheld and may be  
458 vulnerable to harm from family members, partners, healthcare professionals and even researchers.

459 Availability of family planning support and contraception seemed to be mixed. Some women with  
460 SMI may lack capacity to make decisions, such as those related to contraception. Contraception was  
461 often given without their consent in these instances. However, one study mentioned that planning  
462 for management of relapse of mental illness when a women was well would allow them to make  
463 their own decisions about family planning, reflecting the principles of the CRPD in terms of making  
464 decisions according to the best knowledge of an individuals' preferences [92].

## 465 Comparison to Previous Literature

466 Hughes et al. [115] completed a systematic review and meta-analysis of HIV, hepatitis B and  
467 hepatitis C prevalence in people with SMI globally in 2016 (70). They found a higher prevalence of  
468 these viral infections in people with SMI in countries with a low prevalence in the general population  
469 and similar prevalence in countries with a high prevalence in the general population. This systematic  
470 review included many studies that were also included in the current review. The authors identified  
471 high levels of bias present in studies focusing on HIV prevalence in LMIC. They also commented on a  
472 general theme of higher HIV prevalence in women compared to men in both high and low  
473 prevalence countries, which is in keeping with findings from this scoping review. A 2016 systematic  
474 review [117] found that 10% of women with SMI experienced sexual violence, and that this was  
475 significantly higher than men with SMI and the general population. That review mainly included  
476 studies from HIC but had similar findings to this review.

## 477 What This Review Adds

478 Throughout the results, the burden of sexual and reproductive health needs for women with SMI in  
479 LMIC is clearly shown. Rates of STIs, HIV and risky sexual behaviour were high. A small number of  
480 studies on educational programmes for HIV showed positive outcomes. The need for more  
481 education on STIs and unwanted pregnancy prevention was identified. Studies based around  
482 pregnancy were often focused on the use of medication in pregnancy, but a small amount of  
483 research on pregnancy did state advantages (such as providing a purpose in life) and disadvantages  
484 (exacerbation of mental illness) of pregnancy for women with SMI.

485 The link between sexual dysfunction and SMI was found to be complex with multiple factors such as  
486 psychotropic medication, self-esteem and positive and negative symptoms of SMI to be involved. All  
487 studies about sexual violence found that women with SMI were at risk of sexual violence, including  
488 whilst admitted onto mixed inpatient wards, in the home environment or when homeless.

## 489 Limitations

490 Limitations were present in this scoping review. Many LMIC were not covered in this review, and  
491 with the wide variation in contexts, cultures and geography, it is difficult to generalise these findings  
492 to all LMIC. Most studies were of a cross-sectional design, therefore causality cannot be implied for a  
493 majority of papers. As this is a scoping review, bias was not assessed. There may be high levels of  
494 bias in some studies which could skew the conclusions of this review. Many studies had small sample  
495 sizes and are considered alongside larger studies, although an effort was made to note studies that  
496 were particularly small. Grey literature was excluded in this review due to the large amount of peer  
497 reviewed literature available. Capturing unpublished literature may ensure inclusion of more LMICs.

## 498 Strengths

499 The strengths of this scoping review include a rigorous methodology with an iterative approach that  
500 resulted in early decisions to refine the inclusion criteria. Initially, only studies that provided  
501 disaggregated data by gender and diagnosis were included. It was felt that some useful data was  
502 being excluded based on these criteria and therefore, the inclusion criteria was refined to include  
503 aggregated data where at least 50% of participants had SMI or 80% were women. A broad definition  
504 of sexual and reproductive health needs ensured that multiple areas of the review topic were  
505 included and ensured a broad overview of this multifaced area. Double coding was utilised  
506 throughout the review process to increase robustness of findings.

## 507 Implications

### 508 Implications for a subsequent review

509 This scoping review systematically identified literature on the sexual and reproductive health needs  
510 of women in LMIC in relation to study type, focus of study, population, setting and outcome.  
511 Subsequent synthesis of evidence from one or more of the focus areas from this review is planned.

512 This would enable the literature identified to be utilised to inform decision-making in policy and  
513 practice.

514 There are challenges highlighted by this scoping review that will need to be addressed to progress to  
515 full evidence synthesis. Study type will need careful consideration as many of the studies included in  
516 this review were observational and may provide rich insights but be challenging to draw conclusions  
517 from. This review highlighted that only a small proportion of LMIC countries are represented and a  
518 future review will likely need to consider how applicable findings are for the culture and diversity of  
519 other LMIC countries and consider the use of grey literature.

## 520 Implications for research and practice

521 There is a need for future research to better represent the breadth of LMIC countries and for high  
522 quality research to be carried out. Other key gaps in the literature were identified by this review.  
523 This included a need for greater focus on inclusion of people with lived experience as part of studies  
524 looking at sexual violence, as well as ensuring that the ethical and consensual aspects are fully  
525 considered and reported by researchers. These are both areas underscored by the recent work of  
526 ‘The Lancet Commission on ending Stigma and Discrimination in Mental Health’, which outlined the  
527 increased effectiveness of interventions developed in co-production with people who have lived  
528 experience [118]. The Lancet Psychiatry has also recently specified that research submitted for  
529 publication will be required to provide information on how people with lived experience have  
530 shaped research priorities, the design of the study and interpretation and write up of findings [119]  
531 with authors expected to acknowledge this as a limitation of their work where it has not been  
532 carried out [119].

533 Marginalisation and social exclusion not only exacerbate access to mental and physical health care  
534 but are often the catalyst that leads to basic human rights of people with mental health conditions  
535 being contravened [118]. Future research would benefit from focussing on the effectiveness of  
536 interventions that integrate physical and mental health, most notably those aimed at reducing



537 stigma and discrimination around mental health and sexual health needs, as well as culturally  
538 appropriate adaptations [118].

#### 539 Financial Disclosure Statement

540

541 CH and LA receive support from the National Institute for Health and Care Research (NIHR) through  
542 the NIHR Global Health Research Group on Homelessness and Mental Health in Africa (NIHR134325)  
543 and CH also receives support from the SPARK project (NIHR200842) using UK aid from the UK  
544 Government. The views expressed in this publication are those of the authors and not necessarily  
545 those of the NIHR or the Department of Health and Social Care. CH also receives support from WT  
546 grants 222154/Z20/Z and 223615/Z/21/Z.

547

548 For the purposes of open access, the authors have applied a Creative Commons Attribution (CC BY)  
549 licence to any Accepted Author Manuscript version arising from this submission.

550



## 552 References

- 553 [1] United Nations Population Fund. Sexual & reproductive health 2023.  
554 <https://www.unfpa.org/sexual-reproductive-health> (accessed January 4, 2024).
- 555 [2] Peixoto ER de M, Barros FCR de, Guimarães MDC. Fatores associados com a prática do sexo  
556 desprotegido entre homens e mulheres com transtornos mentais no Brasil. *Cad Saude Publica*  
557 2014;30:1475–86. <https://doi.org/10.1590/0102-311X00029313>.
- 558 [3] Chopra MP, Eranti SSV, Prabha SC. HIV-Related Risk Behaviors Among Psychiatric Inpatients in  
559 India. *Psychiatric Services* 1998;49.
- 560 [4] Matshoba T, Mashaphu S, Tomita A, Paruk S. HIV knowledge, attitudes and practices amongst  
561 patients with severe mental illnesses and chronic medical illnesses in Durban, South Africa. *S*  
562 *Afr J Psychiatr* 2021;27:1586.  
563 <https://doi.org/https://dx.doi.org/10.4102/sajpspsychiatry.v27i0.1586>.
- 564 [5] Melo APS, Cesar CC, Acurcio F de A, Campos LN, Ceccato M das GB, Wainberg ML, et al.  
565 Individual and treatment setting predictors of HIV/AIDS knowledge among psychiatric  
566 patients and their implications in a national multisite study in Brazil. *Community Ment Health*  
567 *J* 2010;46:505–16. <https://doi.org/https://dx.doi.org/10.1007/s10597-010-9303-7>.
- 568 [6] United Nations. Convention on the Rights of Persons with Disabilities (CRPD) | Division for  
569 Inclusive Social Development (DISD) 2006.  
570 [https://social.desa.un.org/issues/disability/crpd/convention-on-the-rights-of-persons-with-](https://social.desa.un.org/issues/disability/crpd/convention-on-the-rights-of-persons-with-disabilities-crpd)  
571 [disabilities-crpd](https://social.desa.un.org/issues/disability/crpd/convention-on-the-rights-of-persons-with-disabilities-crpd) (accessed January 4, 2024).
- 572 [7] WHO. Sexual and Reproductive Health and Research (SRH) 2023.  
573 [https://www.who.int/teams/sexual-and-reproductive-health-and-research-\(srh\)/areas-of-](https://www.who.int/teams/sexual-and-reproductive-health-and-research-(srh)/areas-of-work/sexual-health)  
574 [work/sexual-health](https://www.who.int/teams/sexual-and-reproductive-health-and-research-(srh)/areas-of-work/sexual-health) (accessed January 4, 2024).
- 575 [8] Starrs AM, Ezeh AC, Barker G, Basu A, Bertrand JT, Blum R, et al. Accelerate progress—sexual  
576 and reproductive health and rights for all: report of the Guttmacher– Lancet Commission. *The*  
577 *Lancet* 2018;391:2642–92. [https://doi.org/10.1016/S0140-6736\(18\)30293-9](https://doi.org/10.1016/S0140-6736(18)30293-9).
- 578 [9] Guttmacher Institute. Investing in Sexual and Reproductive Health in Low- and Middle-  
579 Income Countries | Guttmacher Institute 2020. [https://www.guttmacher.org/fact-](https://www.guttmacher.org/fact-sheet/investing-sexual-and-reproductive-health-low-and-middle-income-countries)  
580 [sheet/investing-sexual-and-reproductive-health-low-and-middle-income-countries](https://www.guttmacher.org/fact-sheet/investing-sexual-and-reproductive-health-low-and-middle-income-countries) (accessed  
581 January 4, 2024).
- 582 [10] Sedgh G, Ashford LS, Hussain R. Unmet Need for Contraception in Developing Countries:  
583 Examining Women’s Reasons for Not Using a Method 2016.
- 584 [11] Women Enabled International. Women Enabled International Submission to OHCHR Report  
585 on Mental Health and Human Rights 2016.
- 586 [12] Mitchell KR, Lewis R, O’Sullivan LF, Fortenberry JD. What is sexual wellbeing and why does it  
587 matter for public health? *Lancet Public Health* 2021;6:e608–13.  
588 [https://doi.org/10.1016/S2468-2667\(21\)00099-2](https://doi.org/10.1016/S2468-2667(21)00099-2).
- 589 [13] WHO. Transforming mental health for all 2022.

- 590 [14] Rathod S, Pinninti N, Irfan M, Gorczynski P, Rathod P, Gega L, et al. Mental Health Service  
591 Provision in Low- and Middle-Income Countries. *Health Serv Insights*  
592 2017;10:117863291769435. <https://doi.org/10.1177/1178632917694350>.
- 593 [15] WHO. Sexual health, human rights and the law 2015.
- 594 [16] Peters MDJ, Godfrey CM, Khalil H, McInerney P, Parker D, Soares CB. Guidance for conducting  
595 systematic scoping reviews. *Int J Evid Based Healthc* 2015;13:141–6.  
596 <https://doi.org/10.1097/XEB.000000000000050>.
- 597 [17] Tricco AC, Lillie E, Zarin W, O'Brien KK, Colquhoun H, Levac D, et al. PRISMA Extension for  
598 Scoping Reviews (PRISMA-ScR): Checklist and Explanation. *Ann Intern Med* 2018;169:467–73.  
599 <https://doi.org/10.7326/M18-0850>.
- 600 [18] Abayomi O, Adelufosi A, Adebayo P, Ighoroje M, Ajogbon D, Ogunwale A. HIV risk behavior in  
601 persons with severe mental disorders in a psychiatric hospital in Ogun, Nigeria. *Ann Med*  
602 *Health Sci Res* 2013;3:380. <https://doi.org/10.4103/2141-9248.117960>.
- 603 [19] Abekah-Carter K, Oti GO. Perspectives of community members on homeless people with  
604 mental illness in Nsawam, Ghana. *International Journal of Social Psychiatry* 2022;68:196–202.  
605 <https://doi.org/10.1177/0020764020984195>.
- 606 [20] Afe TO, Emedoh TC, Ogunsemi O, Adegbohun AA. Intimate partner violence, psychopathology  
607 and the women with schizophrenia in an outpatient clinic South-South, Nigeria. *BMC*  
608 *Psychiatry* 2016;16. <https://doi.org/10.1186/s12888-016-0898-2>.
- 609 [21] Aboobaker A, Zingela Z. Correlates and cascade of HIV care in patients with psychiatric  
610 disorders in the Eastern Cape province, South Africa. *South African Journal of Psychiatry*  
611 2022;28:a1753. <https://doi.org/https://dx.doi.org/10.4102/sajpsychiatry.v28i0.1753>.
- 612 [22] Amr M, El-Wasify M, Amin T, Roy A. Prevalence and correlates of physical and sexual assault  
613 history in patients with schizophrenia. *Arab Journal of Psychiatry* 2012;23:22–9.
- 614 [23] Aneja J, Arora S. Pregnancy and severe mental illness: Confounding ethical doctrines. *Indian J*  
615 *Med Ethics* 2020:133–9. <https://doi.org/10.20529/IJME.2020.037>.
- 616 [24] Bagadia A, Nanjundaswamy MH, Ganjekar S, Thippeswamy H, Desai G, Chandra PS. Factors  
617 influencing decision-making around pregnancy among women with severe mental illness  
618 (SMI): A qualitative study. *Int J Soc Psychiatry* 2020;66:792–8.  
619 <https://doi.org/https://dx.doi.org/10.1177/0020764020925104>.
- 620 [25] Ben Mahmoud S, Zouari L, Dammak M, Ben Thabet J, Zouari N, Maalej M. Evaluation of  
621 sexuality in 61 subjects suffering from chronic psychosis. *Sexologies: European Journal of*  
622 *Sexology and Sexual Health / Revue Europeenne de Sexologie et de Sante Sexuelle*  
623 2013;22:e59–63. <https://doi.org/https://dx.doi.org/10.1016/j.sexol.2012.08.002>.
- 624 [26] Bhatia T, Franzos MA, Wood JA, Nimgaonkar VL, Deshpande SN. Gender and procreation  
625 among patients with schizophrenia. *Schizophr Res* 2004;68:387–94.  
626 <https://doi.org/https://dx.doi.org/10.1016/j.schres.2003.08.009>.
- 627 [27] Bram N, Rafrafi R, Abdelghaffar W, Lakhali MH, Ouanes S, El Hechmi Z. Sexual dysfunctions in  
628 Tunisian patients with schizophrenia. *Sexologies: European Journal of Sexology and Sexual*  
629 *Health / Revue Europeenne de Sexologie et de Sante Sexuelle* 2014;23:e65–70.  
630 <https://doi.org/https://dx.doi.org/10.1016/j.sexol.2014.05.004>.

- 631 [28] Bursalioglu FS, Aydin B, Yazici E. The correlation between psychiatric disorders and women's  
632 lives. *Journal of Clinical and Diagnostic Research* 2013;7:695–9.  
633 <https://doi.org/https://dx.doi.org/10.7860/JCDR/2013/5635.2884>.
- 634 [29] Caqueo-Urizar A, Fond G, Urzua A, Boyer Guillaume; ORCID: [https://orcid.org/0000-0003-](https://orcid.org/0000-0003-3249-2030)  
635 3249-2030 AI - Urzua, Alfonso; ORCID: <https://orcid.org/0000-0002-0882-2194> LAI-F. Gender  
636 differences in schizophrenia: A multicentric study from three Latin-America countries.  
637 *Psychiatry Res* 2018;266:65–71.  
638 <https://doi.org/https://dx.doi.org/10.1016/j.psychres.2018.05.032>.
- 639 [30] Carey MP, Ravi V, Chandra PS, Desai A, Neal DJ. Prevalence of HIV, hepatitis B, syphilis, and  
640 chlamydia among adults seeking treatment for a mental disorder in southern India. *AIDS*  
641 *Behav* 2007;11:289–97. <https://doi.org/10.1007/s10461-006-9134-2>.
- 642 [31] Carmo RA, Campos LN, Melo APS, Guimaraes MDC. Hepatitis C among patients with mental  
643 illness in Brazil: an analysis of associated factors. *Gen Hosp Psychiatry* 2013;35:129–33.  
644 <https://doi.org/https://dx.doi.org/10.1016/j.genhosppsy.2012.11.005>.
- 645 [32] Carmo RA, Melo APS, Dezanet LNC, De Oliveira HN, Cournos F, Guimarães MDC. Correlates of  
646 hepatitis B among patients with mental illness in Brazil. *Gen Hosp Psychiatry* 2014;36:398–  
647 405. <https://doi.org/10.1016/j.genhosppsy.2014.03.001>.
- 648 [33] Ceylan B, Kocoglu-Tanyer D. An Examination of Turkish Nurses' Attitudes, Awareness and  
649 Practices Regarding Reproductive Health Needs of Individuals With Schizophrenia. *Issues*  
650 *Ment Health Nurs* 2019;40:413–20. <https://doi.org/10.1080/01612840.2018.1509404>.
- 651 [34] Chandra PS, Carey MP, Carey KB, Shalinianant MP, Thomas T. Sexual Coercion and Abuse  
652 Among Women with a Severe Mental Illness in India: An Exploratory Investigation. vol. 44.  
653 2003.
- 654 [35] Chandra PS, Deepthivarma S, Carey MP, Carey KB, Shalinianant MP. A Cry from the Darkness:  
655 Women with Severe Mental Illness in India Reveal Their Experiences with Sexual Coercion.  
656 *Compr Psychiatry* 2003.
- 657 [36] Chandra PS, Carey MP, Carey KB, Rao P, Mbbs J, Thomas T. HIV risk behaviour among  
658 psychiatric inpatients: results from a hospital-wide screening study in southern India. *Compr*  
659 *Psychiatry* 2003.
- 660 [37] Chandra PS, Krishna VAS, Carey MP. Improving Knowledge about HIV and AIDS Among  
661 Persons with a Severe Mental Illness in India. *Indian Journal of Soc Psychiatry* 2006;22:104–9.
- 662 [38] Collins PY, Holman AR, Freeman MC, Patel V. What is the relevance of mental health to  
663 HIV/AIDS care and treatment programs in developing countries? A systematic review. *AIDS*  
664 2006;20:1571–82.
- 665 [39] Collins PY, Berkman A, Mestry K, Pillai A. HIV prevalence among men and women admitted to  
666 a South African public psychiatric hospital. *AIDS Care* 2009;21:863–7.  
667 <https://doi.org/https://dx.doi.org/10.1080/09540120802626188>.
- 668 [40] Collins PY. Dual Taboos: Sexuality and Women with Severe Mental Illness in South Africa.  
669 *Perceptions of Mental Health Care Providers*. vol. 5. 2001.
- 670 [41] Posada Correa AM, Andrade Carrillo RA, Suarez Vega DC, Gómez Cano S, Agudelo Arango LG,  
671 Tabares Builes LF, et al. Sexual and Reproductive Health in Patients with Schizophrenia and

- 672 Bipolar Disorder. *Rev Colomb Psiquiatr* 2020;49:15–22.  
673 <https://doi.org/10.1016/j.rcp.2018.04.007>.
- 674 [42] de Oliveira HN, Machado CJ, Guimaraes MDC. Factors associated with self-report of sexual  
675 violence against men and women with mental disorders in Brazil. *Soc Psychiatry Psychiatr  
676 Epidemiol* 2012;47:1567–79. <https://doi.org/https://dx.doi.org/10.1007/s00127-011-0463-8>.
- 677 [43] Desai G, Chandra P. Ethical issues in treating pregnant women with severe mental illness.  
678 *Indian J Med Ethics* 2019;2.
- 679 [44] Dođu B, Güler J, Čýtak S, Altunkaynak Y, Alpay N, Cankatan Týp Merkezi Ö, et al. Bizofreni  
680 Hastalarýnýn Cinsel Yařama Ýliřkin Öznel Dűbűncelerinin Cinsiyetler Arasý Karbýlařtırmasý  
681 Gender Differences in Subjective Thoughts of Schizophrenia Patients About Their Sexuality.  
682 *Klinik Psikiyatri* 2012;15:238–74.
- 683 [45] Dutra MRT, Campos LN, Guimaraes MDC. Sexually transmitted diseases among psychiatric  
684 patients in Brazil. *Braz J Infect Dis* 2014;18:13–20.  
685 <https://doi.org/https://dx.doi.org/10.1016/j.bjid.2013.04.004>.
- 686 [46] Eroglu MZ, Lus MG. Impulsivity, unplanned pregnancies, and contraception among women  
687 with bipolar disorder. *Neuropsychiatr Dis Treat* 2020;16:407–14.  
688 <https://doi.org/10.2147/NDT.S238887>.
- 689 [47] Esan O, Esan A. Sexual Dysfunction Among Patients With Schizophrenia in Southwest Nigeria.  
690 *J Sex Marital Ther* 2018;44:657–66.  
691 <https://doi.org/https://dx.doi.org/10.1080/0092623X.2018.1447055>.
- 692 [48] Fanta T, Haile K, Abebaw D, Assefa D, Hibdye G. Assessment of sexual dysfunction and  
693 associated factors among patients with schizophrenia in Ethiopia, 2017. *BMC Psychiatry*  
694 2018;18. <https://doi.org/10.1186/s12888-018-1738-3>.
- 695 [49] Gebeyehu DA, Mulatie M. Risky sexual behavior and its associated factors among patients  
696 with severe mental disorder in University of Gondar Comprehensive Specialized Hospital,  
697 2018. *BMC Psychiatry* 2021;21. <https://doi.org/10.1186/s12888-021-03054-z>.
- 698 [50] Ghebrehiwet S, Baul T, Restivo JL, Kelkile TS, Stevenson A, Gelaye B, et al. Gender-specific  
699 experiences of serious mental illness in rural Ethiopia: A qualitative study. *Global Public  
700 Health: An International Journal for Research, Policy and Practice* 2020;15:185–99.  
701 <https://doi.org/https://dx.doi.org/10.1080/17441692.2019.1680723>.
- 702 [51] Grover S, Sahoo S, Chaudhary S, Chakrabarti S, Nehra R, Avasthi A. Gender differences, family  
703 size and fertility rate among patients with bipolar disorder: A study from India. *Psychiatry Res*  
704 2019;272:562–8. <https://doi.org/10.1016/j.psychres.2018.12.156>.
- 705 [52] Guimaraes MDC, McKinnon K, Campos LN, Melo APS, Wainberg M. HIV risk behavior of  
706 psychiatric patients with mental illness: a sample of Brazilian patients. *Braz J Psychiatry*  
707 2010;32:351–60.
- 708 [53] Guimaraes MDC, McKinnon K, Cournos F, Machado CJ, Melo APS, Campos LN, et al.  
709 Correlates of HIV infection among patients with mental illness in Brazil. *AIDS Care*  
710 2014;26:505–13. <https://doi.org/https://dx.doi.org/10.1080/09540121.2013.832722>.
- 711 [54] Hall T, Kakuma R, Palmer L, Minas H, Martins J, Kermode M. Social inclusion and exclusion of  
712 people with mental illness in Timor-Leste: a qualitative investigation with multiple

- 713 stakeholders. BMC Public Health 2019;19:702.  
714 <https://doi.org/https://dx.doi.org/10.1186/s12889-019-7042-4>.
- 715 [55] Halouani N, Ellouze S, Aloulou J, Charfeddine F, Aribi L, Amami O. Sexuality of schizophrenic  
716 women in Tunisia: Case-control study. *Sexualite de la femme schizophrene en Tunisie*: Etude  
717 cas-temoins 2018;27:211–6. <https://doi.org/https://dx.doi.org/10.1016/j.sexol.2017.12.003>.
- 718 [56] Hariri AG, Karadag F, Gurol DT, Aksoy UM, Tezcan AE. Sexual problems in a sample of the  
719 Turkish psychiatric population. *Compr Psychiatry* 2009;50:353–60.  
720 <https://doi.org/10.1016/j.comppsy.2008.09.009>.
- 721 [57] Henning MP, Krüger C, Fletcher L. HIV sero-positivity in recently admitted and long-term  
722 psychiatric in-patients: Prevalence and diagnostic profile. *African Journal of Psychiatry (South  
723 Africa)* 2012;15:47–53. <https://doi.org/10.4314/ajpsy.v15i1.7>.
- 724 [58] Hocaoglu C, Celik FH, Kandemir G, Guveli H, Bahceci B. Sexual dysfunction in outpatients with  
725 schizophrenia in Turkey: A cross-sectional study. *Shanghai Arch Psychiatry* 2014;26:347–56.
- 726 [59] Hou C-L, Zang Y, Rosen RC, Cai M-Y, Li Y, Jia F-J, et al. Sexual dysfunction and its impact on  
727 quality of life in Chinese patients with schizophrenia treated in primary care. *Compr  
728 Psychiatry* 2016;65:116–21.  
729 <https://doi.org/https://dx.doi.org/10.1016/j.comppsy.2015.11.002>.
- 730 [60] Huang Y-H, Hou C-L, Ng CH, Chen X, Wang Q-W, Huang Z-H, et al. Sexual dysfunction in  
731 Chinese rural patients with schizophrenia. *BMC Psychiatry* 2019;19:218.  
732 <https://doi.org/https://dx.doi.org/10.1186/s12888-019-2205-5>.
- 733 [61] Incedere A. Sexual Life and Associated Factors in Psychiatric Patients. *Sex Disabil* 2017;35:89–  
734 106. <https://doi.org/https://dx.doi.org/10.1007/s11195-017-9475-y>.
- 735 [62] Joska JA, Obayemi AJ, Cararra H, Sorsdahl K. Severe mental illness and retention in anti-  
736 retroviral care: a retrospective study. *AIDS Behav* 2014;18:1492–500.  
737 <https://doi.org/https://dx.doi.org/10.1007/s10461-014-0709-z>.
- 738 [63] Kazour F, Obeid S, Hallit Francois; ORCID: <https://orcid.org/0000-0001-9337-4797> AI - Obeid,  
739 Sahar; ORCID: <https://orcid.org/0000-0002-0735-4704> AI - Hallit, Souheil; ORCID:  
740 <https://orcid.org/0000-0001-6918-5689> SAI-K. Sexual desire and emotional reactivity in  
741 chronically hospitalized Lebanese patients with schizophrenia. *Perspect Psychiatr Care*  
742 2020;56:502–7. <https://doi.org/https://dx.doi.org/10.1111/ppc.12455>.
- 743 [64] Kesebir S, Toprak B, Baykaran B, Hariri A, Bilici M. Comparison of sexual function and  
744 hormonal parameters between mood stabilizer treatment modalities in bipolar disorder. *Iki  
745 uclu bozuklukta duygudurum duzenleyici tedavi modaliteleri arasinda cinsel islev ve hormonal  
746 degiskenlerin karsilastirilmesi* 2014;51:242–7.  
747 <https://doi.org/https://dx.doi.org/10.4274/npa.y6838>.
- 748 [65] Kumar NS, Radhika MK, Suresh R, Uvais NA. Comparative Study of Sexual Side Effects in  
749 Female Patients With Schizophrenia Receiving Risperidone or Olanzapine. *Primary Care  
750 Companion for CNS Disorders* 2021;23. <https://doi.org/10.4088/PCC.20m02835>.
- 751 [66] Loganathan S, Murthy RS. Living with schizophrenia in India: Gender perspectives. *Transcult  
752 Psychiatry* 2011;48:569–84. <https://doi.org/10.1177/1363461511418872>.

- 753 [67] Lundberg P, Johansson E, Okello E, Allebeck P, Thorson A. Sexual risk behaviours and sexual  
754 abuse in persons with severe mental illness in Uganda: A qualitative study. *PLoS One* 2012;7.  
755 <https://doi.org/10.1371/journal.pone.0029748>.
- 756 [68] Lundberg P, Nakasujja N, Musisi S, Thorson AE, Cantor-Graae E, Allebeck P. Sexual Risk  
757 Behavior, Sexual Violence, and HIV in Persons With Severe Mental Illness in Uganda: Hospital-  
758 Based Cross-Sectional Study and National Comparison Data. *Am J Public Health*  
759 2015;105:1142–8. <https://doi.org/https://dx.doi.org/10.2105/AJPH.2014.302479>.
- 760 [69] Lundberg P, Nakasujja N, Musisi S, Thorson AE, Cantor-Graae E, Allebeck P. HIV prevalence in  
761 persons with severe mental illness in Uganda: a cross-sectional hospital-based study. *Int J*  
762 *Ment Health Syst* 2013;7:20. <https://doi.org/https://dx.doi.org/10.1186/1752-4458-7-20>.
- 763 [70] Madziro-Ruwizhu TB, Nyagura T, Takarinda K, Jack HE, Kajawu L, Mangezi W. HIV Infection in  
764 Attendees of Psychiatric Clinics in Harare, Zimbabwe; Prevalence, Associated Factors and HIV  
765 Care Uptake. *AIDS Behav* 2019;23:3471–81.  
766 <https://doi.org/https://dx.doi.org/10.1007/s10461-019-02633-2>.
- 767 [71] Magalhaes PV da S, Kapczynski F, Kauer-Sant’Anna M. Use of contraceptive methods among  
768 women treated for bipolar disorder. *Arch Womens Ment Health* 2009;12:183–5.  
769 <https://doi.org/https://dx.doi.org/10.1007/s00737-009-0060-y>.
- 770 [72] Maling S, Todd J, Van Paal L, Grosskurth H, Kinyanda E. HIV-1 seroprevalence and risk factors  
771 for HIV infection among first-time psychiatric admissions in Uganda. *AIDS Care - Psychological*  
772 *and Socio-Medical Aspects of AIDS/HIV* 2011;23:171–8.  
773 <https://doi.org/10.1080/09540121.2010.498939>.
- 774 [73] Mamabolo MM, Magagula TG, Kruger C, Fletcher L. A survey of risk behaviour for contracting  
775 HIV among adult psychiatric patients. A South African study - Part 1. *Afr J Psychiatry*  
776 (Johannesbg) 2012;15:329–34. <https://doi.org/https://dx.doi.org/10.4314/ajpsy.v15i5.40>.
- 777 [74] Marengo E, Martino DJ, Igoa A, Scápola M, Fassi G, Baamonde MU, et al. Unplanned  
778 pregnancies and reproductive health among women with bipolar disorder. *J Affect Disord*  
779 2015;178:201–5. <https://doi.org/10.1016/j.jad.2015.02.033>.
- 780 [75] Marengo E, Martino DJ, Igoa A, Fassi G, Scápola M, Urtueta Baamonde M, et al. Sexual risk  
781 behaviors among women with bipolar disorder. *Psychiatry Res* 2015;230:835–8.  
782 <https://doi.org/10.1016/j.psychres.2015.10.021>.
- 783 [76] Mashapu S, Mkize DL. HIV seropositivity in patients with first-episode psychosis. *The South*  
784 *African Journal of Psychology* 2007;13:90–4.
- 785 [77] Mere SM, Paruk S. A chart review of human immunodeficiency virus status in patients  
786 admitted with psychosis in Durban, South Africa. *South African Journal of Psychiatry* 2018;24.  
787 <https://doi.org/10.4102/sajpsy.2018.24i0.1129>.
- 788 [78] Mirsepassi Z, Raisi F, Shahvari Z, FirooziKhojastefar R, Yahyavi ST. Evaluating family  
789 knowledge about sexual health in patients with severe mental illness: a qualitative study in  
790 Iran. *BMC Psychiatry* 2022;22:174. <https://doi.org/https://dx.doi.org/10.1186/s12888-022-03788-4>.
- 792 [79] Mpango RS, Ssembajjwe W, Rukundo GZ, Birungi C, Kalungi A, Gadown KD, et al. Physical and  
793 psychiatric comorbidities among patients with severe mental illness as seen in Uganda. *Eur*



- 794 Arch Psychiatry Clin Neurosci 2022. [https://doi.org/https://dx.doi.org/10.1007/s00406-022-](https://doi.org/https://dx.doi.org/10.1007/s00406-022-01478-6)  
795 01478-6.
- 796 [80] Mwelase MP, Ntlantsana V, Tomita A, Chiliza B, Paruk S. HIV prevalence and access to HIV  
797 testing and care in patients with psychosis in South Africa. South African Journal of Psychiatry  
798 2023;29. <https://doi.org/10.4102/sajpsychiatry.v29i0.1918>.
- 799 [81] Nakhli J, El Kissi Y, Bouhlel S, Amamou B, Nabli TA, Nasr S Ben, et al. Reliability and validity of  
800 the Arizona Sexual Experiences Scale-Arabic version in Tunisian patients with schizophrenia.  
801 Compr Psychiatry 2014;55:1473–7.  
802 <https://doi.org/https://dx.doi.org/10.1016/j.comppsy.2014.04.006>.
- 803 [82] Nakigudde J, Ehnvall A, Mirembe F, Musisi S, Airaksinen E. An exploratory study on the  
804 feasibility and appropriateness of family psychoeducation for postpartum women with  
805 psychosis in Uganda. BMC Psychiatry 2013;13:131.  
806 <https://doi.org/https://dx.doi.org/10.1186/1471-244X-13-131>.
- 807 [83] Negash B, Asmamewu B, Alemu WG. Risky sexual behaviors of schizophrenic patients: A  
808 single center study in Ethiopia, 2018. BMC Res Notes 2019;12.  
809 <https://doi.org/10.1186/s13104-019-4673-6>.
- 810 [84] Obo CS, Sori LM, Abegaz TM, Molla BT. Risky sexual behavior and associated factors among  
811 patients with bipolar disorders in Ethiopia. BMC Psychiatry 2019;19:313.  
812 <https://doi.org/https://dx.doi.org/10.1186/s12888-019-2313-2>.
- 813 [85] Olisah VO, Sheikh TL, Abah ER, Mahmud-Ajeigbe AF. Sociodemographic and clinical correlates  
814 of sexual dysfunction among psychiatric outpatients receiving common psychotropic  
815 medications in a Neuropsychiatric Hospital in Northern Nigeria. Niger J Clin Pract  
816 2016;19:799–806. <https://doi.org/https://dx.doi.org/10.4103/1119-3077.180063>.
- 817 [86] Opondo PR, Ho-Foster AR, Ayugi J, Hatitchki B, Pumar M, Bilker WB, et al. HIV Prevalence  
818 Among Hospitalized Patients at the Main Psychiatric Referral Hospital in Botswana. AIDS  
819 Behav 2018;22:1503–16. <https://doi.org/https://dx.doi.org/10.1007/s10461-017-1878-3>.
- 820 [87] Özcan NK, Boyacıoğlu NE, Enginkaya S, Dinç H, Bilgin H. Reproductive health in women with  
821 serious mental illnesses. J Clin Nurs 2014;23:1283–91. <https://doi.org/10.1111/jocn.12332>.
- 822 [88] Ozcan NK, Boyacioglu NE, Dikeç G, Dinc H, Enginkaya S, Tomruk N. Prenatal and Postnatal  
823 Attachment Among Turkish Mothers Diagnosed with a Mental Health Disorder. Issues Ment  
824 Health Nurs 2018;39:795–801.  
825 <https://doi.org/https://dx.doi.org/10.1080/01612840.2018.1455773>.
- 826 [89] Pehlivanoglu K, Tanriover O, Tomruk N, Karamustafalioglu N, Oztekin E, Alpay N. Family  
827 Planning Needs and Contraceptive Use in Female Psychiatric Outpatients. TURKISH JOURNAL  
828 OF FAMILY MEDICINE AND PRIMARY CARE (TJFMPC) 2007;1.
- 829 [90] Pinto D de S, Mann CG, Wainberg M, Mattos P, Broxado de Oliveira S. Sexuality, vulnerability  
830 to HIV, and mental health: an ethnographic study of psychiatric institutions. Cad Saúde  
831 Pública 2007;23:2224–33. <https://doi.org/10.1590/s0102-311x2007000900030>.
- 832 [91] Poreddi V, Sai Nikhil Reddy S, Gandhi S, Marimuthu P, BadaMath S. “Unheard voices”:  
833 Perceptions of women with mental illness on nurses screening routinely for domestic

834 violence: A qualitative analysis. *Invest Educ Enferm* 2021;39.  
835 <https://doi.org/10.17533/udea.iee.v39n3e03>.

836 [92] Rezaie L, Phillips D. Post-discharge needs of Iranian women diagnosed with severe mental  
837 illness: A qualitative study. *J Psychiatr Ment Health Nurs* 2020;27:752–62.  
838 <https://doi.org/10.1111/jpm.12634>.

839 [93] Sethuraman B. Factors associated with contraceptive use in women with schizophrenia. *Arch  
840 Womens Ment Health* 2019;22:705–6. [https://doi.org/https://dx.doi.org/10.1007/s00737-  
841 019-00996-y](https://doi.org/https://dx.doi.org/10.1007/s00737-019-00996-y).

842 [94] Shahvari Z, Raisi F, Firoozi Khojastefar R, Yahyavi ST, Mirsepassi Z. Memos on Sexuality  
843 Education Effectiveness; A Qualitative Study in Severe Mental Illness in Iran. *International  
844 Journal of Sexual Health* 2020;32:254–66. <https://doi.org/10.1080/19317611.2020.1793047>.

845 [95] Sibanyoni AU, Joubert M. Are female bipolar patients of reproductive age aware of the  
846 teratogenic risk of sodium valproate? A qualitative study. *South African Journal of Psychiatry*  
847 2022;28:a1719. <https://doi.org/https://dx.doi.org/10.4102/sajpsychiatry.v28i0.1719>.

848 [96] Simiyon M, Chandra PS, Desai G. Sexual dysfunction among women with Schizophrenia-A  
849 cross sectional study from India. *Asian J Psychiatr* 2016;24:93–8.  
850 <https://doi.org/https://dx.doi.org/10.1016/j.ajp.2016.08.022>.

851 [97] Singh D, ChB M, Berkman A, Bresnahan M. Seroprevalence and HIV-associated factors among  
852 adults with severe mental illness-a vulnerable population. *South African Medical Journal*  
853 2009.

854 [98] Souaiby L, Kazour F, Zoghbi M, Bou Khalil R, Richa S. Sexual dysfunction in patients with  
855 schizophrenia and schizoaffective disorder and its association with adherence to  
856 antipsychotic medication. *Journal of Mental Health* 2020;29:623–30.  
857 <https://doi.org/https://dx.doi.org/10.1080/09638237.2019.1581333>.

858 [99] Souto Melo AP, Machado CJ, Crosland Guimaraes MD. HIV testing in psychiatric patients in  
859 Brazil. *J Acquir Immune Defic Syndr* 2011;57 Suppl 3:S157-63.  
860 <https://doi.org/https://dx.doi.org/10.1097/QAI.0b013e31821e9be1>.

861 [100] Terzian ACC, Andreoli SB, Razzouk D, Chaves AC. Fertility and fecundity of an outpatient  
862 sample with schizophrenia. *Revista Brasileira de Psiquiatria* 2006;28:305–7.  
863 <https://doi.org/http://dx.doi.org/10.1590/S1516-44462006005000018>.

864 [101] Tharoor H, Kaliappan A, Gopal S. Sexual dysfunctions in schizophrenia: Professionals and  
865 patients perspectives. *Indian J Psychiatry* 2015;57:85–7. [https://doi.org/10.4103/0019-  
866 5545.148532](https://doi.org/10.4103/0019-5545.148532).

867 [102] Tomruk N, Tanriover O. HIGH RISK BEHAVIOURS FOR SEXUALLY TRANSMITTED DISEASES IN  
868 FEMALE PSYCHIATRIC OUTPATIENTS IN TURKEY review View project Yaşlılıkta Beslenme ve  
869 Diyet View project. 2006.

870 [103] Tumwakire E, Arnd H, Gavamukulya Y. A qualitative exploration of Ugandan mental health  
871 care workers' perspectives and experiences on sexual and reproductive health of people  
872 living with mental illness in Uganda. *BMC Public Health* 2022;22:1722.  
873 <https://doi.org/https://dx.doi.org/10.1186/s12889-022-14128-2>.

- 874 [104] Tunde-Ayinmode MF. Current knowledge and pattern of use of family planning methods  
875 among a severely ill female Nigerian psychiatric outpatients: Implication for existing service.  
876 *Ann Afr Med* 2013.
- 877 [105] Wainberg ML, Alfredo Gonzalez M, McKinnon K, Elkington KS, Pinto D, Gruber Mann C.  
878 Targeted ethnography as a critical step to inform cultural adaptations of HIV prevention  
879 interventions for adults with severe mental illness. *Soc Sci Med* 2007;65:296–308.  
880 <https://doi.org/https://dx.doi.org/10.1016/j.socscimed.2007.03.020>.
- 881 [106] Wainberg ML, McKinnon K, Elkington KS, Mattos PE, Mann CG, Pinto D de S, et al. HIV risk  
882 behaviors among outpatients with severe mental illness in Rio de Janeiro, Brazil. *World*  
883 *Psychiatry* 2008;7:166–72. [https://doi.org/http://dx.doi.org/10.1002/j.2051-](https://doi.org/http://dx.doi.org/10.1002/j.2051-5545.2008.tb00190.x)  
884 [5545.2008.tb00190.x](https://doi.org/http://dx.doi.org/10.1002/j.2051-5545.2008.tb00190.x).
- 885 [107] Yang J wei, Yu K, Wang X qing, Wang Y, Zhang CC, Ma R, et al. Sexual needs of people with  
886 schizophrenia: a descriptive phenomenological study. *BMC Psychiatry* 2023;23.  
887 <https://doi.org/10.1186/s12888-023-04640-z>.
- 888 [108] Yu K, Wang Y, Wang X, Ma R, Li Y, Zhou Y. Experience of reproductive concerns in women  
889 with schizophrenia: A descriptive phenomenological study. *Int J Nurs Stud* 2022;135:1–7.  
890 <https://doi.org/https://dx.doi.org/10.1016/j.ijnurstu.2022.104343>.
- 891 [109] Zerihun T, Bekele D, Birhanu E, Worku Y, Deyesa N, Tesfaye M. Family planning awareness,  
892 utilization and associated factors among women of reproductive age attending psychiatric  
893 outpatient care, a cross- sectional study, Addis Ababa, Ethiopia. *PLoS One* 2020;15:e0238766.  
894 <https://doi.org/https://dx.doi.org/10.1371/journal.pone.0238766>.
- 895 [110] Zerihun T, Sorsdahl K, Hanlon C. Family planning for women with severe mental illness in  
896 rural Ethiopia: a qualitative study. *Reprod Health* 2021;18. [https://doi.org/10.1186/s12978-](https://doi.org/10.1186/s12978-021-01245-1)  
897 [021-01245-1](https://doi.org/10.1186/s12978-021-01245-1).
- 898 [111] Zerihun T, Tesfaye M, Deyessa N, Bekele D. Intimate partner violence among reproductive-  
899 age women with chronic mental illness attending a psychiatry outpatient department: Cross-  
900 sectional facility-based study, Addis Ababa, Ethiopia. *BMJ Open* 2021;11.  
901 <https://doi.org/10.1136/bmjopen-2020-045251>.
- 902 [112] Zhang Q, Xie JJ. Association between schizophrenia and syphilis: A retrospective study in  
903 Xiamen, China. *BMC Psychiatry* 2018;18. <https://doi.org/10.1186/s12888-018-1869-6>.
- 904 [113] Zhang Y, Tang Z, Ruan Y, Huang C, Wu J, Lu Z, et al. Prolactin and Thyroid Stimulating  
905 Hormone (TSH) Levels and Sexual Dysfunction in Patients with Schizophrenia Treated with  
906 Conventional Antipsychotic Medication: A Cross-Sectional Study. *Med Sci Monit*  
907 2018;24:9136–43. <https://doi.org/https://dx.doi.org/10.12659/MSM.913759>.
- 908 [114] The World Bank. Life Expectancy at Birth (Total) - Low and Middle Income Countries .  
909 [https://DataWorldbankOrg/Indicator/SpDynLe00.in?End=2021&locations=xo&start=1960&vi](https://DataWorldbankOrg/Indicator/SpDynLe00.in?End=2021&locations=xo&start=1960&view=chart)  
910 [ew=chart](https://DataWorldbankOrg/Indicator/SpDynLe00.in?End=2021&locations=xo&start=1960&view=chart) 2022.
- 911 [115] Hughes E, Bassi S, Gilbody S, Bland M, Martin F. Prevalence of HIV, hepatitis B, and hepatitis C  
912 in people with severe mental illness: a systematic review and meta-analysis. *Lancet*  
913 *Psychiatry* 2016;3:40–8. [https://doi.org/10.1016/S2215-0366\(15\)00357-0](https://doi.org/10.1016/S2215-0366(15)00357-0).

- 914 [116] Hughes E, Bassi S, Gilbody S, Bland M, Martin F. Prevalence of HIV, hepatitis B, and hepatitis C  
915 in people with severe mental illness: a systematic review and meta-analysis. *Lancet*  
916 *Psychiatry* 2016;3:40–8. [https://doi.org/10.1016/S2215-0366\(15\)00357-0](https://doi.org/10.1016/S2215-0366(15)00357-0).
- 917 [117] Khalifeh H, Oram S, Osborn D, Howard LM, Johnson S. Recent physical and sexual violence  
918 against adults with severe mental illness: a systematic review and meta-analysis.  
919 *International Review of Psychiatry* 2016;28:433–51.  
920 <https://doi.org/10.1080/09540261.2016.1223608>.
- 921 [118] Thornicroft G, Sunkel C, Alikhon Aliev A, Baker S, Brohan E, el Chammay R, et al. The Lancet  
922 Commission on ending stigma and discrimination in mental health. *The Lancet*  
923 2022;400:1438–80. [https://doi.org/10.1016/S0140-6736\(22\)01470-](https://doi.org/10.1016/S0140-6736(22)01470-2/ATTACHMENT/89C56927-C832-4D5C-ACFB-15D3517E058C/MMC3.PDF)  
924 [2/ATTACHMENT/89C56927-C832-4D5C-ACFB-15D3517E058C/MMC3.PDF](https://doi.org/10.1016/S0140-6736(22)01470-2/ATTACHMENT/89C56927-C832-4D5C-ACFB-15D3517E058C/MMC3.PDF).
- 925 [119] Davis S, Pinfold V, Catchpole J, Lovelock C, Senthil B, Kenny A. Reporting lived experience  
926 work. *Lancet Psychiatry* 2024;11:8–9. [https://doi.org/10.1016/S2215-0366\(23\)00402-9](https://doi.org/10.1016/S2215-0366(23)00402-9).
- 927
